1 **Inactivation of GalU leads the cell wall-associated polysaccharide defect to reduce the**  
2 **susceptibility to bacteriolytic agents in *Enterococcus faecalis*.**

3

4 Jun Kurushima<sup>1</sup>, Haruyoshi Tomita<sup>1,2,#</sup>

5

6 <sup>1</sup>Department of Bacteriology, Gunma University Graduate School of Medicine, 3-39-22,

7 Showa-machi, Maebashi-shi, Gunma 371-8511, Japan

8 <sup>2</sup>Laboratory of Bacterial Drug Resistance, Gunma University Graduate School of Medicine,

9 3-39-22, Showa-machi, Maebashi-shi, Gunma 371-8511, Japan

10

11 <sup>#</sup>Corresponding author: Haruyoshi Tomita

12 E-mail: tomitaha@gunma-u.ac.jp

13 Phone: +81-27-220-7990. Fax: +81-27-220-7996

14 **Running title:** Role of *galU* on bacteriolysis in *E. faecalis*.

15

16 Keywords: Enterococcus, polysaccharide, galactose, antibiotic resistance, bacteriocin,

17 morphogenesis, UDP-glucose phosphorylase, imaging, beta-lactam, cell death

18

19 **Abstract (216 words)**

20 Enterococcal plasmid-encoded bacteriolysin Bac41 is a selective antimicrobial  
21 system that is considered to provide a competitive advantage to *Enterococcus faecalis* cells  
22 that carry the Bac41-coding plasmid. The Bac41 effector consists of the secreted proteins  
23 BacL<sub>1</sub> and BacA, which attack the cell wall of the target *E. faecalis* cell to induce  
24 bacteriolysis. Here, we demonstrated that *galU*, which encodes UTP-glucose-1-phosphate  
25 uridylyltransferase, is involved in susceptibility to the Bac41 system in *E. faecalis*.  
26 Spontaneous mutants that developed resistance to the antimicrobial effects of BacL<sub>1</sub> and  
27 BacA were revealed to carry a truncation deletion of the C-terminal 288–298 a.a. region of  
28 the translated GalU protein. This truncation resulted in the depletion of UDP-glucose, leading  
29 to a failure to utilize galactose and produce the enterococcal polysaccharide antigen (EPA),  
30 which is expressed abundantly on the cell surface of *E. faecalis*. This cell surface composition  
31 defect that resulted from *galU* or EPA-specific genes caused an abnormal cell morphology,  
32 with impaired polarity during cell division and alterations of the limited localization of BacL<sub>1</sub>.  
33 Interestingly, these mutants conferred reduced susceptibility to beta-lactams, despite their  
34 increased susceptibility to other bacteriostatic antimicrobial agents and chemical detergents.  
35 These data suggest that a complex mechanism of action underlies lytic killing, as exogenous  
36 bacteriolysis induced by lytic bacteriocins or beta-lactams requires an intact cell physiology

37 in *E. faecalis*.

38

### 39 **Importance**

40 Cell wall-associated polysaccharides of bacteria are involved in various  
41 physiological characteristics. Recent studies demonstrated that the cell wall-associated  
42 polysaccharide of *Enterococcus faecalis* is required for susceptibility to bactericidal  
43 antibiotic agents. Here, we demonstrated that a *galU* mutation resulted in resistance to the  
44 enterococcal lytic bacteriocin Bac41. The *galU* homologue is reported to be essential for  
45 biosynthesis of species-specific cell wall-associated polysaccharides in other Firmicutes. In  
46 *E. faecalis*, the *galU* mutant lost the *E. faecalis*-specific cell wall-associated polysaccharide  
47 EPA (enterococcal polysaccharide antigen). The mutant also displayed reduced  
48 susceptibility to antibacterial agents and an abnormal cell morphology. We firstly  
49 demonstrated that *galU* was essential for EPA biosynthesis in *E. faecalis*, and EPA production  
50 might underlie susceptibility to lytic bacteriocin and antibiotic agents by undefined  
51 mechanism.

52

### 53 **Keywords**

54 *Enterococcus faecalis*, bacteriocin, cell morphology, UDP-glucose phosphorylase,

55 beta-lactams

56

## 57 **Introduction**

58 *Enterococcus faecalis* is a Gram-positive opportunistic pathogen that is a causative  
59 agent of several infectious diseases, such as urinary infections, bacteremia, endocarditis, and  
60 others (1). This organism belongs to the lactic acid bacteria and is also a microbial resource  
61 that produces various bacteriocins (2). Bacteriocins are antimicrobial proteins or peptides  
62 that are produced by bacteria and are considered to play a role in bacterial competition within  
63 the microbial ecological environment (3). Gram-positive bacterial bacteriocins are classified  
64 according to their structures or synthetic pathways (4). Class I bacteriocins, which are  
65 referred to as lantibiotics, are heat-stable peptides that contain non-proteinogenic amino acids  
66 modified by post-translational modifications(5). Class II bacteriocins are also heat-stable  
67 peptides, but they are synthesized without any post-translational modification (6). In *E.*  
68 *faecalis*, beta-hemolysin/bacteriocin (cytolysin), which is the major virulence factor, and  
69 enterocin W belong to the class I bacteriocins (7–9). On the other hand, most enterococcal  
70 bacteriocins, including Bac21, Bac31, Bac32, Bac43, Bac51 and others, belong to the class  
71 II peptides(6, 8, 10–15) . Class III bacteriocins are proteinaceous heat-labile bacteriocins that  
72 differ from the class I or II peptides. Therefore, bacteriocins of this class are often referred to  
73 as bacteriolysins. Two enterococcal bacteriolysins, enterolysin A and Bac41, have been  
74 identified to date (16, 17).

75           The bacteriolysin Bac41 was originally found in the conjugative plasmid pYI14 of  
76 *E. faecalis* clinical strain YI14 and is widely distributed among clinical isolates including  
77 vancomycin resistant enterococci (VRE) (17–19). The activity of this bacteriocin is specific  
78 towards *E. faecalis* and not other *Enterococcus* or bacterial species (20). The genetic element  
79 of Bac41 consists of *bacL<sub>1</sub>*, *bacL<sub>2</sub>*, *bacA*, and *bacl*. BacL<sub>1</sub> and BacA are the effectors  
80 responsible for the antimicrobial activity of this bacteriocin against *E. faecalis*. BacL<sub>2</sub> is  
81 involved in the expression of antimicrobial activity as transcriptional positive regulator (17,  
82 21). BacI is required for the self-protection of Bac41-producing *E. faecalis* cells from the  
83 antimicrobial activity of BacL<sub>1</sub> and BacA. Both the BacL<sub>1</sub> and BacA molecules contain  
84 conserved peptidoglycan hydrolase domains, suggesting that these molecules attack the  
85 target's cell wall (17). Endopeptidase activity against the *E. faecalis* cell wall has been  
86 detected experimentally in BacL<sub>1</sub> (22). However, the peptidoglycan degrading activity of  
87 BacA has not been detected, and the enzymatic function of this molecule remains unknown.  
88 BacL<sub>1</sub> binds specifically to the nascent cell wall or to cell division loci via its C-terminal SH3  
89 repeat domain (20). The resulting cell growth inhibition protects against the binding of BacL<sub>1</sub>  
90 and markedly reduces susceptibility to bacterial killing by Bac41 effectors. It is important to  
91 note that the BacL<sub>1</sub> cell wall degradation process is essential but not sufficient to kill the  
92 bacteria; bacteriolysis requires the additional action of the undefined BacA.

93            In this paper, we isolated a spontaneous mutant of *E. faecalis* that exhibited  
94 resistance to the toxicity of BacL<sub>1</sub> and BacA to further understand the bacteriolytic  
95 mechanism of the Bac41 system. Genomic variant analysis showed that an intact *galU* gene  
96 was essential for susceptibility to BacL<sub>1</sub> and BacA. Furthermore, we demonstrated that *galU*  
97 is also essential for galactose fermentation and for the synthesis of the enterococcal  
98 polysaccharide antigen, which is required for maintaining the normal cell morphology and  
99 for susceptibility to antimicrobial agents.

100 **Results**

101 **Inactivation of *galU* results in decreased susceptibility to Bac41.** To identify the target  
102 *E. faecalis* cell factor(s) involved in Bac41-mediated bacterial killing, spontaneous mutants  
103 that are resistant to the Bac41 effectors BacL<sub>1</sub> and BacA were obtained. We carried out a soft-  
104 agar bacteriocin experiment in which the susceptible bacterial strain *E. faecalis* OG1S was  
105 inoculated into and grown in THB agar (0.75%), and a mixture of recombinant BacL<sub>1</sub> and  
106 BacA proteins (25 ng of each protein) was spotted onto the *E. faecalis*-containing THB agar.  
107 After incubation at 37 °C overnight, a clear growth inhibition zone was formed in the area  
108 where the recombinant proteins had been spotted (22). Notably, additional incubation  
109 resulted in the occurrence of small colonies within the growth inhibitory zone. These colonies  
110 were considered to be spontaneously resistant mutants, so we isolated these colonies as  
111 candidates that may carry a genetic mutation related to bacterial killing by Bac41. To identify  
112 the genetic mutation that caused this spontaneous Bac41 resistance, we performed whole-  
113 genome sequencing and a variant analysis of the mutant strains. The contigs from the genome  
114 sequence of the parent strain *E. faecalis* OG1S and the isogenic mutant were obtained by  
115 next generation sequencing and were mapped onto the reference strain *E. faecalis* OG1RF  
116 (accession No. NC\_017316). One of these spontaneous mutants, sr #4, carried the point  
117 mutation C862T within the *galU* (annotated as *cap4C* in the OG1RF genomic information)



118 coding sequence (Fig. 1A). The wild-type *galU* gene consists of 897-bp, and its translated  
119 product GalU is 298 a.a. in length. The mutation found in sr #4 was a nonsense mutation and  
120 resulted in the truncation of the GalU protein by a C-terminal deletion of 288–298 a.a. (Fig.  
121 1B). Complementation via the introduction of the intact *galU* gene carried by the  
122 expression vector *pgalU* restored the mutant strain's susceptibility to Bac41 activity to the  
123 level of the parent strain (Fig. 1C). In addition, a liquid phase bacteriolytic assay also  
124 demonstrated that the spontaneous mutant (referred to as *galU*<sup>-</sup> hereafter) could still grow in  
125 the presence of recombinant BacL<sub>1</sub> (rBacL<sub>1</sub>) and BacA (rBacA), while the wild-type strain  
126 underwent considerable lysis (Fig. 1D). The complementation of the *galU* mutation via the  
127 expression of intact *galU in trans* (*galU*<sup>-</sup>/*pgalU*) but not the control vector (*galU*<sup>-</sup>/*Vec*)  
128 restored the strain's susceptibility to bacteriolysis to the same degree as the wild-type strain.  
129 The viability of the *galU*<sup>-</sup> and *galU*<sup>-</sup>/*Vec* strains exhibited a >100-fold increase in comparison  
130 to the WT and *galU*<sup>-</sup>/*pgalU* strains after treatment with rBacL<sub>1</sub> and rBacA (5 μg/ml each) for  
131 4 h (Fig. 1E). Therefore, these results strongly demonstrated that the truncated mutation of  
132 the *galU* gene resulted in resistance to the antimicrobial activity of Bac41.

133

134 **The enterococcal *galU* is essential for the fermentation of galactose and the production**

135 **of cell wall-associated polysaccharides.**

136           The *galU* gene encodes UDP-glucose phosphorylase (UDPG::PP, EC: 2.7.7.9),  
137 which generates UDP-glucose from a UTP molecule and glucose-1-phosphate (23). The  
138 homologues of this gene are universally conserved not only in prokaryotes but also in  
139 eukaryotes (24). It has been reported extensively that among both Gram-positive and Gram-  
140 negative bacteria, this enzymatic activity of GalU is essential for the carbohydrate  
141 metabolism that is involved in multiple bacterial physiological pathways; however, the  
142 precise role of GalU in *E. faecalis* remains undefined. UDP-glucose, which is the product of  
143 GalU, is utilized for galactose fermentation via the Leloir pathway in lactic acid bacteria (Fig.  
144 2A) (25). We tested whether the strain that possesses an inactivated *galU* has the ability to  
145 undergo galactose fermentation (Fig. 2B). The wild-type strain and the complemented strain  
146 had the ability to ferment both glucose and galactose. In contrast, the *galU* mutant strain and  
147 the *galU*<sup>-</sup>/Vec strain could utilize glucose but not galactose. In addition, the in-frame deletion  
148 mutants of *galU* that were constructed via site-directed mutagenesis also failed to utilize  
149 galactose in the two different lineages OG1RF and FA2-2 (Supplementary figure S1). These  
150 data clearly indicated that GalU produces UDP-glucose in *E. faecalis* and in other species  
151 and also suggested that the C-terminal truncation of GalU in the *galU*<sup>-</sup> strain resulted in the  
152 complete loss of its UDP-glucose phosphorylase (UDPG::PP) activity.

153            In addition to its role in galactose fermentation, GalU and its product, UDP-glucose,  
154   are essential for the biosynthesis of bacterial glycopolymers, such as LPS, teichoic acid and  
155   capsular polysaccharide, which are important structural components that determine the  
156   properties of the bacterial cell surface (26). For example, in *S. pneumoniae*, which has more  
157   than 90 capsular variants, GalU is essential for the biosynthesis of various types of capsular  
158   polysaccharide (Mollerach et al., 1998). The cell surface polysaccharide profiles of *E.*  
159   *faecalis* strains were previously demonstrated (27, 28) . To investigate the effect of the *galU*  
160   mutation on capsular polysaccharide synthesis in enterococci, cell wall-associated  
161   polysaccharides were prepared from the *E. faecalis* WT, *galU*<sup>-</sup>, *galU*<sup>-</sup>/*Vec* and *galU*<sup>-</sup>/*pgalU*  
162   strains and subjected to polyacrylamide gel electrophoresis analysis, followed by  
163   visualization with cationic staining (Fig. 2C). The most abundant band, which corresponds  
164   to the enterococcal polysaccharide antigen (EPA), was observed in the wild-type OG1S and  
165   *galU*<sup>-</sup>/*pgalU* strains. In contrast, the EPA had completely disappeared in the *galU*<sup>-</sup> and *galU*<sup>-</sup>  
166   /vector strains. This result strongly suggested that the *galU* gene is essential for EPA  
167   production in *E. faecalis*.

168            Previous studies identified the specific EPA biosynthesis gene cluster *epaA–R* (27,  
169   29, 30). Several *epa* gene mutants with altered EPA composition, such as mutants of *epaA*,  
170   *B*, *E*, *M*, *N*, *I*, *X* or *O*, displayed a pleiotropic phenotype that included abnormal cell

171 morphology, defective biofilm formation, and increased susceptibility to antimicrobial agents  
172 and phages, as well as other phenotypes (30, 31). We investigated the effect of *galU*  
173 inactivation on cell morphology. *E. faecalis* is an ovococcal bacterium with an ellipsoid-cell  
174 shape, and its size is approximately 2  $\mu\text{m}$  by 1  $\mu\text{m}$ . Observation under a scanning electron  
175 microscope revealed that the *galU*<sup>-</sup> strain showed an abnormal cell morphology with a  
176 rounded cell shape and a slightly larger size (~2  $\mu\text{m}$ ) (Fig. 3A). Fluorescent imaging using  
177 DAPI, which is a fluorescence probe for DNA, revealed that abnormal multinucleated cells  
178 were present in the *galU*<sup>-</sup> population (Fig. 3B). The complemented strain *galU*<sup>-</sup>/*pgalU* but  
179 not the control vector *galU*<sup>-</sup>/*Vec* showed the same morphological phenotype as the wild-type  
180 strain. These observations suggested that the truncation of the *galU* gene leads to a marked  
181 morphological defect.

182

183 **The loss of cell wall-associated EPA does not block targeting and cell wall degrading of**  
184 **BacL<sub>1</sub> to the cell wall.**

185 We previously reported that the peptidoglycan degradation activity of BacL<sub>1</sub> is not  
186 sufficient but still essential for Bac41-mediated bacterial killing (22). We examined whether  
187 the observed resistance to Bac41 activity in the *galU*<sup>-</sup> mutant results from decreased  
188 susceptibility of the cell wall to BacL<sub>1</sub>. Cell wall fractions prepared from the wild-type OG1S

189 strain and the *galU*, *galU*<sup>-</sup>/*Vec* or *galU*<sup>-</sup>/*pgalU* strains were treated with recombinant BacL<sub>1</sub>,  
190 followed by incubation at 37 °C (Fig. 4A). The cell walls from the parent strain and the  
191 complemented strain were degraded to 52.8% and 51.9% of the initial amount after 6 hours  
192 of incubation, respectively. In contrast, the *galU*<sup>-</sup>- and *galU*<sup>-</sup>/*Vec*-derived cell walls were also  
193 degraded to 70.6% and 68.5%, respectively, by BacL<sub>1</sub>, although degradation rates were  
194 slightly attenuated compared to those of the parent strain and the complemented strain. In  
195 addition, the cell walls of *galU*<sup>-</sup> and *galU*<sup>-</sup>/*Vec* also displayed reduced susceptibility to  
196 mutanolysin, which is a peptidoglycan hydrolase but has no capacity to induce definite  
197 bacteriolysis (Supplementary figure S2) (22). These observations suggested the possibility  
198 that cell wall of *galU* mutant is still susceptible to peptidoglycan hydrolase activity of BacL<sub>1</sub>.  
199 The binding of BacL<sub>1</sub> via its C-terminal SH3 repeat domain, which is located in 329–380 a.a.,  
200 is limited to the cell division loci of the target cell wall and is essential for the peptidase  
201 activity of BacL<sub>1</sub> (22). To investigate whether the binding affinity of BacL<sub>1</sub> for the *galU*<sup>-</sup> cell  
202 wall was involved in attenuated susceptibility to degradation by BacL<sub>1</sub>, fluorescence-labeled  
203 recombinant BacL<sub>1</sub> was incubated with *E. faecalis* cells and its localization was analyzed by  
204 fluorescent microscopy. In the parent strain and the complemented strain, BacL<sub>1</sub> binding was  
205 limited to division loci, as reported previously (Fig. 4B, Supplementary figure S3A) (20). In  
206 *galU*<sup>-</sup> mutant, BacL<sub>1</sub> strongly bound to over the cells surface even more diffusely and was

207 less limited to specific target loci, showing that the affinity of BacL<sub>1</sub> for the cell wall the  
208 *galU*<sup>-</sup> strain appeared to be even more increased compared to those of wild type. These  
209 observations suggested that attenuated susceptibility to BacL<sub>1</sub> degradation is not likely cause  
210 of the development of Bac41 resistance in the *galU* mutant, even though the overall cell  
211 surface affinity for BacL<sub>1</sub> was altered in the *galU*<sup>-</sup> mutant.

212 To investigate whether the phenotypes of the *galU*<sup>-</sup> mutant resulted specifically  
213 from the loss of cell wall-associated polysaccharides, we constructed a deletion mutant of  
214 *epaB*, which is involved in the major EPA biosynthesis pathway (Fig. 5A) (31). The  
215 inactivation of *epaB* is suggested to result in an altered EPA structure and composition and  
216 reduced cell envelope integrity. The *epaB* mutant ( $\Delta epaB$ ) no longer produces EPA (30, 32),  
217 meanwhile it displayed normal galactose fermentation as like wild type (Supplementary  
218 figure S4). Notably, the  $\Delta epaB$  clearly represented resistance to Bac41 as *galU*<sup>-</sup> mutant (Fig  
219 5B and C), suggesting that Bac41 resistance in *galU*<sup>-</sup> mutant is mostly due to inability of EPA  
220 production.

221 To test whether BacL<sub>1</sub> degradation susceptibility of cell wall lacking EPA, cell wall  
222 purified from the  $\Delta epaB$  mutant was subjected to cell wall degradation assay (Supplementary  
223 figure S5). BacL<sub>1</sub> was able to degrade cell wall of all tested strains including the  $\Delta epaB$ ,  
224  $\Delta galU$  (*galU* in-frame deletion) and their derivatives with plasmids for complementation as

225 well as wild-type strain. In addition, BacL<sub>1</sub> could bind to cell surface of the  $\Delta epaB$  mutant as  
226 wild type (Fig. S3B). In order to characterize localization of BacL<sub>1</sub> binding on each strain in  
227 detail, we observed relative subcellular-localization of fluorescein-labeled SH3-repeat of  
228 BacL<sub>1</sub> (BacL<sub>1</sub>\_SH3), which expresses strong and stable fluorescence signal compared to full-  
229 length BacL<sub>1</sub> protein (20), on wild type, the  $\Delta galU$  and the  $\Delta epaB$  mutants (Fig. 5D). On  
230 demograph based on microscope image, BacL<sub>1</sub>\_SH3 bound around division site of  $\Delta galU$   
231 and  $\Delta epaB$  equally to wild type as previously reported (20). It is noted that BacL<sub>1</sub>\_SH3  
232 localization in the  $\Delta galU$  mutant was even stronger and more dispersed on the cell surface  
233 compared to wild type. These observations are in line with our previously mentioned  
234 hypothesis that alternation of cell wall integrity does not affect BacL<sub>1</sub> targeting for  
235 endopeptidase activity and does not underlie resistant phenotype of these mutant against  
236 Bac41-induced cell lysis.

237

### 238 **The *galU* inactivation and loss of EPA reduce susceptibility to beta-lactams.**

239 It has been suggested that EPA deficiency results in reduced cell surface integrity  
240 and consequently leads to increased susceptibility to antimicrobial agents or several  
241 environmental stress (31, 33, 34). To test this phenotype in the *galU* strain, we evaluated  
242 susceptibility to antibiotics in the OG1S derivatives (Table 2). Consistent with previous

243 reports, bacteriostatic antibiotics (vancomycin and gentamycin) and detergent (sodium  
244 dodecyl sulfate (SDS)) were more effective against the *galU*<sup>-</sup> and *galU*<sup>-</sup>/*Vec* strains than the  
245 wild-type and complemented strains. In contrast, the MICs of beta-lactams (ampicillin and  
246 penicillin G) for the *galU*<sup>-</sup> strain were 4 mg/L and 2 mg/L, respectively, indicating reduced  
247 susceptibility in comparison to the parent strain. As already shown by Singh and Murray (35),  
248 the  $\Delta$ *epaB* strain also displayed higher MICs and reduced susceptibility for beta-lactams than  
249 its parent (Table 2, Fig. 5C). The viability of the *galU*<sup>-</sup> mutant after treatment with ampicillin  
250 (ABPC; 4 mg/L) for 4 h was increased approximately 10-fold in comparison to the wild-type  
251 strain (Fig. 6A). In microscopic experiments, the wild-type strain displayed morphological  
252 changes, with an elongated or rhomboid shape after 60 min of treatment with ABPC (4 mg/L),  
253 and most cells exhibited drastic cell disruption between 90 and 180 min after the treatment  
254 (Fig. 6B). On the other hand, the *galU*<sup>-</sup> strain displayed a milder phenotype, with a swollen  
255 shape, showing a response distinct from that of the wild-type strain (Fig. 6B). In addition,  
256 only a few disrupted *galU*<sup>-</sup> cells were observed, even 180 min after treatment with AMP. To  
257 distinguish between a bacteriolytic effect and a growth inhibition (bacteriostatic) effect of  
258 AMP, the turbidity of bacterial broth cultures was monitored in the presence and absence of  
259 ABPC (4 mg/L) (Fig. 6C). In the wild-type strain, the turbidity was increased after 60 min of  
260 incubation, in the presence of ABPC and in the mock control. However, after 90 min, a drastic



261 reduction of turbidity was detected, and the turbidity was eventually lower than the initial  
262 turbidity. In contrast, after exposure to AMP, the *galU*<sup>-</sup> strain continued to grow constantly  
263 without reduced turbidity, although its growth rate was slower than that of the untreated  
264 culture. These results were consistent with the microscopic observations, in that the *galU*<sup>-</sup>  
265 mutant could be susceptible to the bacteriostatic effect of ABPC but not to the bacteriolytic  
266 effect. Furthermore, fluorescently detection assay for cell lysis by Ethidium homodimer  
267 (EthD) clearly showed that ABPC treatment increased dead cell population in wild type (Fig.  
268 6D and E). On the other hand, the  $\Delta galU$  and  $\Delta epaB$  mutants did not show significant  
269 increases of dead cell population compared to un-treatment control. Also, cell elongation  
270 effect of ABPC is relatively less in the  $\Delta galU$  and the  $\Delta epaB$  mutants while ABPC treatment  
271 resulted in the significant elongation of cell length in wild type (Fig. 6F). Altogether, these  
272 data suggested that unlike other drugs and detergents, the bacteriolytic action of beta-lactams  
273 requires an intact cell surface composition constructed by the *galU* or *epa* genes.

## 274 **Discussion**

### 275 **The function of the *E. faecalis* GalU C-terminus**

276           Here, we demonstrated that a spontaneous Bac41-resistant isolate carried a  
277 truncation mutation in the *galU* gene, with the deletion of 11 C-terminal residues (Fig. 1).  
278 Like related species, the GalU of *E. faecalis* contains a conserved nucleotide transferase  
279 domain at 5–257 a.a (Supplementary figure S6 and S7). However, the resistant mutant has a  
280 truncation deletion of 288–298 a.a., which does not correspond to the conserved domain.  
281 Despite this anomaly, this partial truncation leads to the inactivation of the protein’s UDP-  
282 glucose phosphorylase activity (Fig. 2 and Supplementary figure S1). Structural studies of  
283 GalU homologues from several bacterial species revealed that their C-terminal domains  
284 entangled each other to form homo-dimers (36, 37). Thus, it is possible that the deletion of  
285 just 11 amino acids from the C-terminal moiety might impair this dimerization, resulting in  
286 a conformational defect that affects GalU enzymatic activity.

287

### 288 **The role of *galU* in cell wall polysaccharide production in *E. faecalis* strains**

289           The *gpsA-galU* locus is conserved among *Enterococcus* and *Streptococcus* species,  
290 although its chromosomal location and flanking genetic context are unrelated  
291 (Supplementary figure S7). This locus has been best studied in *Streptococcus pneumoniae*,

292 which is a bacterial pathogen that causes pneumonia in humans (38). The surface capsular  
293 polysaccharide (CPS) of *S. pneumoniae* is a major virulence factor and the target for  
294 vaccination. More than 90 CPS types that have been defined in *S. pneumoniae* are  
295 synthesized from the corresponding specific *cps* locus, which is located between *pbp2X* and  
296 *pbp1A* (39). Although the *cps* genes are variable and specific for each of the 90 capsule types,  
297 *gpsA-galU* is highly conserved in a location that is distant from *cps* and is essential for the  
298 biosynthesis of every capsule type (40). Thus, *gpsA-galU* is suggested to play a critical role  
299 in the highly conserved universal pathway for cell surface-associated polysaccharides in  
300 various lactic acid bacterial species (41, 42). For *E. faecalis*, four serotypes (A, B, C and D)  
301 have been identified (43). These serotypes are defined by variants of two cell surface  
302 components: CPS and EPA (44). The CPS is serotype-specific and is represented only in  
303 serotypes C and D but not in serotypes A and B (28). Conversely, EPA is represented in every  
304 *E. faecalis* strain with any serotype. OG1 strains belong to the serotype B lineage that  
305 possesses only EPA. Meanwhile, the serotype C strains, such as FA2-2 and V583, produce  
306 both EPA and CPS (43, 44). Teng *et al.* identified the EPA-synthesizing *epa* gene cluster  
307 (locus tag 11715–11738), which is distant from the *gpsA-galU* locus (locus tag 11457 and  
308 11458), on the OG1RF chromosome (29, 31). Recent study by Guerardel *et al.* defined  
309 structure of EPA and it consists of several sugars, including glucose, galactose, rhamnose,

310 and ribitol (27). According to previous studies of capsular polysaccharide synthesis, those  
311 sugars are utilized to construct the cell wall glycopolymer through uridyl-nucleotide  
312 intermediates, such as UDP-glucose, which is produced by GalU. The data showing that the  
313 inactivation of the *galU* gene caused the abolishment of EPA (Fig. 2C) demonstrated the  
314 involvement of the *gpsA-galU* locus in the universal biosynthetic pathway for cell surface  
315 polysaccharide species in *E. faecalis*, which is similar to available reports for *S. pneumoniae*.  
316 The deletion of *galU* resulted in the complete loss of cell wall-associated polysaccharides in  
317 the serotype C *E. faecalis* FA2-2 (Supplementary figure S8), suggesting that GalU also plays  
318 a role in CPS production. This study is the first report to describe the function of *galU* in the  
319 biosynthesis of cell wall-associated polysaccharides in *E. faecalis*.

320

### 321 **Deduced model of *galU*-dependent susceptibility to lytic agents**

322 A previous study revealed that the inactivation of *galU* decreases cellular  
323 robustness against several stresses, such as antibiotics and H<sub>2</sub>O<sub>2</sub> (45). Here we confirmed  
324 that the *galU*<sup>-</sup> strain displayed lower MICs for gentamicin, daptomycin and SDS in  
325 comparison to the parent strain (Table 2). However, we focused on the opposite phenotype  
326 that the inactivation of *galU* conferred resistance to the lytic bacteriocin Bac41 (BacL<sub>1</sub> and  
327 BacA) and beta-lactams (Fig. 1, Fig. 6 and Table 2). In comparison with the wild-type strain,

328 the *galU* strain produced a cell wall with slightly reduced susceptibility to BacL<sub>1</sub> degradation  
329 (Fig. 4A). The contribution of this phenotype to resistance should be partial, and this process  
330 did not appear to be the fundamental mechanism by which the bacteriolytic activity of Bac41  
331 is triggered by the undefined action of BacA following peptidoglycan degradation by BacL<sub>1</sub>  
332 (20). UDP-glucose is essential for the biosynthesis of not only cell surface polysaccharides  
333 but also other cell wall-associated components, such as teichoic acid. The  $\Delta$ *epaB* mutant that  
334 displayed a specific EPA defect conferred Bac41 resistance, as observed for the *galU* mutant  
335 (Fig. 5C). However, we cannot conclude that EPA contributed exclusively or directly to  
336 susceptibility to Bac41 because both mutants displayed the characteristic phenotype of  
337 abnormal cell morphology (Fig. 3 and Fig. 5) (30), suggesting that this drastic phenotype is  
338 caused by the loss of envelope integrity that results from the depletion of cell wall-associated  
339 polysaccharides (31). It is worth noting that the morphological defects observed in the *galU*  
340 and *epaB* mutants were not identical, which implies that other UDP-glucose-derived  
341 components might affect the phenotype of the *galU* mutant. In *Bacillus subtilis*, which is a  
342 model organism for Firmicutes, GtaB (a GalU homologue) is indispensable for cell  
343 morphology. The GtaB-deficient mutant exhibits a dislocation of FtsZ, which is a conserved  
344 protein that determines the contracting (separating) site during binary cell division, and the  
345 mutant consequently exhibits impaired cell division with an abnormal cell shape(46). As

346 shown in Fig. 4, the *galU* mutant gave rise to a dispersed localization of BacL<sub>1</sub>, which binds  
347 specifically to the nascent cell wall and displays a limited localization at the mid-cell in the  
348 wild-type strain (20). Since the cell division machinery complex performs dual functions  
349 (synthesize and degrade peptidoglycan), the failure to properly control this machinery,  
350 especially the inhibition of penicillin binding proteins (PBPs), leads to lethal effects on  
351 bacterial cells. The potential intrinsic lethality of the cell division machinery has been  
352 suggested to underlie beta-lactam-induced bacteriolysis (47). Therefore, it is possible that  
353 the deactivated cell division machinery in the *galU* and  $\Delta$ *epaB* mutants reduces the intrinsic  
354 lethality of the cell division machinery, resulting in resistance to Bac41 or beta-lactams.  
355 Collectively, this study provides insights into the intrinsic factors involved in the extrinsic  
356 bacteriolysis mechanism in *E. faecalis*, but further investigation is required to understand the  
357 precise mechanism that underlies these effects.  
358

## 359 **Experimental procedures**

### 360 **Bacterial strains, plasmids and antimicrobial agents.**

361           The bacterial strains and the plasmids used in this study are shown in Table 1.  
362 *Enterococcal* strains were routinely grown in Todd-Hewitt broth (THB) (Difco, Detroit, MI)  
363 at 37 °C (48), unless stated otherwise. *Escherichia coli* strains were grown in Luria-Bertani  
364 (LB) (Difco) medium at 37 °C. The antibiotic concentrations used to select *E. coli* were 100  
365 mg/L of ampicillin (AMP), 30 mg/L of chloramphenicol and 500 mg/L of erythromycin. The  
366 concentrations used for the routine selection of *E. faecalis* harboring pMGS100 or  
367 pMSP3535 derivatives were 20 mg/L of chloramphenicol or 10 mg/L of erythromycin,  
368 respectively. Nisin was added at a concentration of 25 mg/L for the cultivation of the *E.*  
369 *faecalis* strain harboring pMSP3535. All antibiotics were obtained from Sigma Co. (St. Louis,  
370 MO).

371

### 372 **Soft-agar bacteriocin experiment.**

373           The soft-agar assay for bacteriocin activity was performed as described previously  
374 (7). Briefly, 1 µL of recombinant protein solution (25 ng/µl) was inoculated into THB soft-  
375 agar (0.75%) containing the indicator strain and was then incubated at 37 °C for 24 h. The  
376 formation of an inhibitory zone was evaluated as sign of bacteriocinogenic activity of the test

377 strain. The histidine-tagged recombinant proteins of BacL<sub>1</sub> and BacA were prepared by the  
378 Ni-nitrilotriacetic acid (Ni-NTA) system (Invitrogen, Carlsbad, CA) as previously described  
379 (22).

380

### 381 **Next generation sequencing and variant analysis.**

382 Genomic DNA (gDNA) was extracted from *E. faecalis* OG1S and its isogenic  
383 spontaneous mutant using an Isoplat DNA isolation kit (Nippon gene, Tokyo, Japan)  
384 according to the manufacturer's instructions, and submitted to Otagenetics Corporation  
385 (Norcross, GA USA) for exome capture and sequencing. Briefly, gDNA was subjected to  
386 agarose gel electrophoresis and OD ratio tests to confirm the purity and concentration of the  
387 DNA prior to Bioruptor (Diagenode, Inc., Denville, NJ USA) fragmentation. Fragmented  
388 gDNAs were tested for size distribution and concentration using an Agilent Bioanalyzer 2100  
389 or Tapestation 2200 and Nanodrop. Illumina libraries were made from qualified fragmented  
390 gDNA using SPRIworks HT Reagent Kit (Beckman Coulter, Inc. Indianapolis, IN USA,  
391 catalog# B06938) or NEBNext reagents (New England Biolabs, Ipswich, MA USA, catalog#  
392 E6040) and the resulting libraries were then sequenced on an Illumina HiSeq2000/2500  
393 which generated paired-end reads of 100 nucleotides (nt). Data was analyzed for data quality  
394 using FASTQC (Babraham Institute, Cambridge, UK).



395

396 **Construction of expression plasmids.**

397           To complement the *galU* defect in the *galU*<sup>-</sup> strain, a *galU* expression plasmid  
398 designated as *pgalU* was constructed as described below. A 927-bp fragment containing the  
399 full-length *galU* gene (897-bp) and an additional sequence at both ends (15-bp each) was  
400 amplified by PCR with the primers F-*galU*-pMGS and R-*galU*-pMGS, using *E. faecalis*  
401 OG1S genomic DNA as the template. Using In-fusion HD cloning (Clontech, Mountain View,  
402 CA), the resulting fragment was cloned into pMGS100 (49), which was linearized by  
403 digestion with *NdeI* and *XhoI*. The resulting plasmid was designated *pgalU*. To complement  
404 the *epaB* defect, an *epaB* expression plasmid designated as *pepaB* was constructed as  
405 described below. An 819-bp fragment containing the full-length *epaB* gene (OG1RF\_11737,  
406 789-bp) and an additional sequence at both ends (15-bp each) was amplified by PCR with  
407 the primers F-*epaB*-pMSP3535 and R-*epaB*-pMSP3535, using *E. faecalis* OG1RF genomic  
408 DNA as the template. Using In-fusion HD cloning (Clontech, Mountain View, CA), the  
409 resulting fragment was cloned into pMSP3535 (50), which was linearized by digestion with  
410 *BamHI*. The resulting plasmid was designated *pepaB*.

411

412 **Site-directed in-frame deletion of *galU*.**

413 Site-directed mutagenesis was carried out as described previously by Kristich *et al*  
414 (51). The 1-kbp flanking DNA fragments of the upstream or downstream regions of *galU*  
415 (OG1RF previously annotated *cap4C*) were amplified by PCR with the primers F-*galU*-del-  
416 up and R-*galU*-del-up or F-*galU*-del-dwn and R-*galU*-del-dwn, respectively, using  
417 *Enterococcus faecalis* OG1RF genomic DNA as the template. The resulting fragments were  
418 fused via overlapping PCR with the primers F-*galU*-del-up and R-*galU*-del-dwn, and the  
419 resulting 2-kb fragment was digested with *EcoRI* and cloned into pCJK47 at its *EcoRI* site  
420 to obtain pCJK47::*ΔgalU*. The pCJK47::*ΔgalU* plasmid was introduced into *E. faecalis*  
421 CK111 and was then transferred into *E. faecalis* OG1RF and FA2-2. The integrants of  
422 OG1RF and FA2-2 in which pCJK47::*ΔgalU* was integrated into the chromosome via  
423 primary crossing over were isolated through erythromycin selection. Cultivation without the  
424 drug allowed crossing over to facilitate the drop out of pCJK47 derivatives. The isolated  
425 candidates were screened by PCR with primers that were set outside of the region used for  
426 cloning into pCJK47. The site-directed deletion of the *epaB* gene was also carried out as  
427 described above, except pCJK47::*ΔepaB* was constructed using specific primer pairs (F-  
428 *epaB*-del-up and R-*epaB*-del-up or F-*epaB*-del-dwn and R-*epaB*-del-dwn) for the upstream  
429 region or the downstream region, respectively. Both the *ΔgalU* and *ΔepaB* mutants carry the  
430 initial 30 nt from the start codon and the terminal 30 nt, including the stop codon, without a

431 frame-shift (N-terminal 10 a.a. and C-terminal 9 a.a.). The mutant genes encode the 19 a.a.  
432 fusion proteins with N-terminal 10 a.a. and C-terminal 9 a.a. regions.

433

#### 434 **Scanning electron microscopy.**

435           A 200  $\mu$ L overnight culture of bacteria was diluted 5-fold with 800  $\mu$ L of fresh  
436 THB, and transferred onto a coverslip glass (Iwanami) in 24-well plate following incubation  
437 at 37 °C for 2 h (Iwanami). The coverslip was rinsed with 1 mL of 0.1M cacodylate buffer  
438 (pH 7.4). The bacteria on the coverslip were fixed with 1 mL of 1st fixation buffer [2%  
439 glutaraldehyde, 4% sucrose, 0.15% alcian blue, 0.1M cacodylate buffer (pH 7.4)] for 2 h at  
440 room temperature (RT). After primary fixation, the coverslip was washed three times with  
441 0.1M cacodylate buffer (pH 7.4). An additional fixation was carried out with 1 mL of 2nd  
442 fixation buffer [0.5% OsO<sub>4</sub>, 0.1M cacodylate buffer (pH 7.4)] for 2 h at RT. The coverslip  
443 was washed with 0.1M cacodylate buffer (pH 7.4). The sample was dehydrated using an  
444 ascending ethanol series [50% (1 min), 70% (2 min), 80% (3 min), and 100% (5 min  $\times$  2)]  
445 and was air-dried. Osmium coating was carried out at 5–6 mA, for 20 sec using an Osmium  
446 coater (Neoc-ST, Meiwafoysis CO., LTD, Tokyo, Japan). The sample was observed in the  
447 Scanning electron microscopy (S-4100, Hitachi, Tokyo, Japan).

448

449 **Fluorescent microscopy.**

450           The red fluorescent dye-labeled recombinant protein of BacL<sub>1</sub> was prepared with  
451 NH<sub>2</sub>-reactive HiLyte Fluor 555 (Dojindo, Kumamoto, Japan) as previously described (20).  
452 Bacteria diluted with fresh medium were mixed with fluorescent recombinant protein and  
453 incubated at 37 °C for 1 h. The bacteria were collected by centrifugation at 5,800 g for 3 min  
454 and then fixed with 4% paraformaldehyde at room temperature (RT) for 15 min. The bacteria  
455 were rinsed and resuspended with distilled water and mounted with Prolong gold antifade  
456 reagent with 4', 6-di-amidino-2-phenylindole (DAPI; Invitrogen) on a glass slide. The  
457 sample was analyzed by fluorescence microscopy (Axiovert 200; Carl Zeiss, Oberkochen,  
458 Germany), and images were obtained with a DP71 camera (Olympus, Tokyo, Japan). For  
459 detection of dead cells, ethidium homodimer (EthD, Molecular probe) was added in bacterial  
460 culture at the final concentration of 2 μM and prepared for the microscopic analysis as  
461 described above. Raw image data were processed using FIJI(52). Cell segmentation and  
462 generation of fluorescence signal demograph were performed by Oufiti(53). Statistical  
463 analysis and graphical representation on imaging data acquired by Oufiti was performed by  
464 using R packages BactMAP(54) and ggplot2(55).

465

466 **Preparation and degradation analysis of the cell wall fraction.**

467           The bacterial culture was collected by centrifugation and rinsed with 1 M NaCl.  
468   The bacterial pellet was suspended in 4% SDS and heated at 95°C for 30 min. After rinsing  
469   with distilled water (DW) four times, unbroken cells were removed by centrifugation at 1,000  
470   rpm for 1 min and the cell wall fraction in the supernatant was collected by centrifugation at  
471   15,000 rpm for 10 min and was then treated with 0.5 mg/mL trypsin (0.1 M Tris-HCl [pH  
472   6.8], 20 mM CaCl<sub>2</sub>) at 37 °C for 16 h. The sample was further washed with DW four times  
473   and was resuspended in 10% trichloroacetic acid (TCA), followed by incubation at 4°C for  
474   5 h, and then given four additional washes with DW. Finally, the cell wall fraction was  
475   resuspended in PBS. The cell wall degradation rate was quantified by measuring the optical  
476   density at 620 nm (OD<sub>620</sub>) using a microplate reader (Thermo).

477

478 **Preparation of cell surface polysaccharides.**

479           Cell surface polysaccharides were prepared as described by Hancock and Gilmore  
480   (44). An overnight bacterial culture was inoculated with as a 1:100 dilution into 25 ml of  
481   THB containing with 1% glucose and grown at 37 °C for 5 h and then centrifuged to collect  
482   the cells (3,000 rpm, 10 min). The cells were washed with 2 ml of Tris-Sucrose solution [10  
483   mM Tris (pH8.0), 25% sucrose]. The resulting cell pellets were resuspended in the Tris-

484 Sucrose solution containing lysozyme (1 mg/ml) and mutanolysin (10 U/ml), and incubated  
485 at 37 °C for 16 h. The suspension was then centrifuged (8,000 rpm, 3 min). The supernatant  
486 was collected into a new tube and was treated with RNase I (100 µg/ml) and DNase I (10  
487 U/ml) at 37 °C for 4h. Pronase E was added (20 µg/ml) and the sample further incubated at  
488 37 °C for 16 h. 500 µl of chloroform was added to the sample, which was then centrifuged  
489 (12,000, 10 min). The aqueous phase (~300 µl) was transferred into a new tube and 920 µl  
490 of ethanol added (final concentration, 75%) to precipitate the contents at -80°C for 30 min.  
491 The precipitate was pelleted by centrifugation (15,000 rpm, 10 min), air dried, and  
492 resuspended with 100 µl of DW into one tube. Approximately 2.5 µl of the resulting sample  
493 was subjected to 10% acrylamide gel electrophoresis buffered by TBE (10mM Tris, 10 mM  
494 borate, 2 mM EDTA). The separated carbohydrates were visualized with Stains-All (Sigma).  
495

#### 496 **Fermentation test.**

497           Fermentation of the respective sugar was examined as described before (40).  
498 Briefly, the *E. faecalis* strains were streaked on Heart infusion (HI, Difco) agar supplemented  
499 with 1% glucose or 1% galactose. Phenol red was added as a pH indicator at the final  
500 concentration of 25 ppm. After incubation overnight at 37 °C, fermentation was evaluated by  
501 the appearance of bacterial colonies and acidification of the agar medium.

502

503 **Antimicrobial susceptibility testing**

504           The MICs of the antibiotics were determined by the agar dilution method according  
505 to CLSI recommendations [Clinical and Laboratory Standards Institute (<http://clsi.org/>)]. An  
506 overnight culture of each strain grown in Mueller-Hinton broth (Nissui, Tokyo, Japan) was  
507 diluted 100-fold with fresh broth. An inoculum of approximately  $5 \times 10^5$  cells was spotted  
508 onto a series of Mueller-Hinton agar (Eiken, Tokyo, Japan) plates containing a range of  
509 concentrations of the test drug. After incubation at 37 °C for 24 h, the number of colonies  
510 that had grown on the plates was determined.

511

512 **Acknowledgements**

513           We thank Dr. Gary Dunny for providing the bacterial strains and the plasmids used  
514 to construct the mutants, Ms. Mari Arai and Ms. Satomi Tsuchihashi for providing technical  
515 assistance in this study, and Dr. Elizabeth Kamei for providing English proofreading of this  
516 manuscript.

517

518 **Funding information**

519 This work was supported by grants from the Japanese Ministry of Education, Culture, Sport,  
520 Science and Technology [Kiban (C) 18K07101, Grant-in-Aid for Young Scientists (B)  
521 25870116, Gunma University Operation Grants] and the Japanese Ministry of Health, Labor  
522 and Welfare (the Research Program on Emerging and Re-emerging Infectious Diseases from  
523 Japan Agency for Medical Research and Development (AMED [20fk0108061h0503,  
524 20wm0225008h0201]), H27-Shokuhin-Ippan-008).



525 **References**

526

- 527 1. Arias, C. A., and Murray, B. E. (2012) The rise of the Enterococcus: beyond vancomycin  
528 resistance. *Nature Reviews Microbiology*. **10**, 266–278
- 529 2. Nes, I. F., Diep, D. B., and Holo, H. (2007) Bacteriocin Diversity in Streptococcus and  
530 Enterococcus. *Journal of bacteriology*. **189**, 1189–1198
- 531 3. Nes, I. F., Clewell, D. B., Ike, Y., Shankar, N., and Diep, D. B. (2014) Enterococcal  
532 Bacteriocins and Antimicrobial Proteins that Contribute to Niche Control
- 533 4. Jack, R. W., Tagg, J. R., and Ray, B. (1995) Bacteriocins of gram-positive bacteria.  
534 *Microbiological reviews. Baltimore*. **59**, 171–200
- 535 5. Field, D., Hill, C., Cotter, P. D., and Ross, R. P. (2010) The dawning of a “Golden era”  
536 in lantibiotic bioengineering. *Molecular microbiology*. **78**, 1077–1087
- 537 6. Aymerich, T., Holo, H., Håvarstein, L. S., Hugas, M., Garriga, M., and Nes, I. F. (1996)  
538 Biochemical and genetic characterization of enterocin A from *Enterococcus faecium*, a new  
539 antilisterial bacteriocin in the pediocin family of bacteriocins. *Applied and Environmental*  
540 *Microbiology*. **62**, 1676–1682
- 541 7. Ike, Y., Clewell, D. B., Segarra, R. A., and Gilmore, M. S. (1990) Genetic analysis of the  
542 pAD1 hemolysin/bacteriocin determinant in *Enterococcus faecalis*: Tn917 insertional  
543 mutagenesis and cloning. *Journal of bacteriology*. **172**, 155–163
- 544 8. Sawa, N., Wilaipun, P., Kinoshita, S., Zendo, T., Leelawatcharamas, V., Nakayama, J.,  
545 and Sonomoto, K. (2012) Isolation and characterization of enterocin W, a novel two-  
546 peptide lantibiotic produced by *Enterococcus faecalis* NKR-4-1. *Applied and*  
547 *Environmental Microbiology*. **78**, 900–903
- 548 9. Haas, W., Shepard, B. D., and Gilmore, M. S. (2002) Two-component regulator of  
549 *Enterococcus faecalis* cytolysin responds to quorum-sensing autoinduction. *Nature*. **415**,  
550 84–87

- 551 10. Inoue, T., Tomita, H., and Ike, Y. (2006) Bac 32, a novel bacteriocin widely  
552 disseminated among clinical isolates of *Enterococcus faecium*. *Antimicrobial Agents and*  
553 *Chemotherapy*. **50**, 1202–1212
- 554 11. Martínez-Bueno, M., Maqueda, M., Galvez, A., Samyn, B., Beeumen, J. V., Coyette, J.,  
555 and Valdivia, E. (1994) Determination of the gene sequence and the molecular structure of  
556 the enterococcal peptide antibiotic AS-48. *Journal of bacteriology*. **176**, 6334–6339
- 557 12. Todokoro, D., Tomita, H., Inoue, T., and Ike, Y. (2006) Genetic analysis of bacteriocin  
558 43 of vancomycin-resistant *Enterococcus faecium*. *Applied and Environmental*  
559 *Microbiology*. **72**, 6955–6964
- 560 13. Tomita, H., Fujimoto, S., Tanimoto, K., and Ike, Y. (1997) Cloning and genetic and  
561 sequence analyses of the bacteriocin 21 determinant encoded on the *Enterococcus faecalis*  
562 pheromone-responsive conjugative plasmid pPD1. *Journal of bacteriology*. **179**, 7843–  
563 7855
- 564 14. Tomita, H., Fujimoto, S., Tanimoto, K., and Ike, Y. (1996) Cloning and genetic  
565 organization of the bacteriocin 31 determinant encoded on the *Enterococcus faecalis*  
566 pheromone-responsive conjugative plasmid pYI17. *Journal of bacteriology*. **178**, 3585–  
567 3593
- 568 15. Yamashita, H., Tomita, H., Inoue, T., and Ike, Y. (2011) Genetic organization and  
569 mode of action of a novel bacteriocin, Bacteriocin 51: determinant of VanA-type  
570 vancomycin-resistant *Enterococcus faecium*. *Antimicrobial Agents and Chemotherapy*. **55**,  
571 4352–4360
- 572 16. Nilsen, T., Nes, I. F., and Holo, H. (2003) Enterolysin A, a cell wall-degrading  
573 bacteriocin from *Enterococcus faecalis* LMG 2333. *Applied and Environmental*  
574 *Microbiology*. **69**, 2975–2984
- 575 17. Tomita, H., Kamei, E., and Ike, Y. (2008) Cloning and genetic analyses of the  
576 bacteriocin 41 Determinant encoded on the *Enterococcus faecalis* pheromone-responsive  
577 conjugative plasmid pYI14: a novel bacteriocin complemented by two extracellular  
578 components (lysin and activator). *Journal of bacteriology*. **190**, 2075–2085

- 579 18. Kurushima, J., Ike, Y., and Tomita, H. (2016) Partial diversity generates effector-  
580 immunity specificity of the Bac41-like bacteriocins of *Enterococcus faecalis* clinical  
581 strains. *Journal of bacteriology*. 10.1128/jb.00348-16
- 582 19. Zheng, B., Tomita, H., Inoue, T., and Ike, Y. (2009) Isolation of VanB-type  
583 *Enterococcus faecalis* strains from nosocomial infections: first report of the isolation and  
584 identification of the pheromone-responsive plasmids pMG2200, encoding VanB-type  
585 vancomycin resistance and a Bac41-type bacteriocin, and pMG2201, encoding  
586 erythromycin resistance and cytolysin (Hly/Bac). *Antimicrobial Agents and Chemotherapy*.  
587 **53**, 735–747
- 588 20. Kurushima, J., Nakane, D., Nishizaka, T., and Tomita, H. (2015) Bacteriocin Protein  
589 BacL1 of *Enterococcus faecalis* Targets Cell Division Loci and Specifically Recognizes l-  
590 Ala2-Cross-Bridged Peptidoglycan. *Journal of bacteriology*. **197**, 286–295
- 591 21. Tomita, H., Todokoro, D., and Ike, Y. (2010) Genetic analysis of the bacteriocin 41  
592 encoded on the *Enterococcus faecalis* pheromone-responsive conjugative plasmid pYI14.  
593 *3rd International ASM Conference on Enterococci, Abstr. 30B, pp. 37–38, American*  
594 *Society for Microbiology, Washington, D. C.*
- 595 22. Kurushima, J., Hayashi, I., Sugai, M., and Tomita, H. (2013) Bacteriocin protein BacL1  
596 of *Enterococcus faecalis* is a peptidoglycan D-isoglutamyl-L-lysine endopeptidase. *Journal*  
597 *of Biological Chemistry*. **288**, 36915–36925
- 598 23. Bonofiglio, L., García, E., and Mollerach, M. (2005) Biochemical Characterization of  
599 the Pneumococcal Glucose 1-Phosphate Uridyltransferase (GalU) Essential for Capsule  
600 Biosynthesis. *Curr Microbiol*. **51**, 217–221
- 601 24. Mendicino, J. (1960) Sucrose phosphate synthesis in wheat germ and green leaves. *The*  
602 *Journal of biological chemistry*. **235**, 3347–3352
- 603 25. Neves, A. R., Pool, W. A., Solopova, A., Kok, J., Santos, H., and Kuipers, O. P. (2010)  
604 Towards enhanced galactose utilization by *Lactococcus lactis*. *Applied and Environmental*  
605 *Microbiology*. **76**, 7048–7060
- 606 26. Berbis, M., Sanchez-Puelles, J., Canada, F., and Jimenez-Barbero, J. (2015) Structure  
607 and Function of Prokaryotic UDP-Glucose Pyrophosphorylase, A Drug Target Candidate.  
608 *Curr Med Chem*. **22**, 1687–1697

- 609 27. Guerardel, Y., Sadovskaya, I., Maes, E., Furlan, S., Chapot-Chartier, M.-P., Mesnage,  
610 S., Rigottier-Gois, L., and Serror, P. (2020) Complete Structure of the Enterococcal  
611 Polysaccharide Antigen (EPA) of Vancomycin-Resistant *Enterococcus faecalis* V583  
612 Reveals that EPA Decorations Are Teichoic Acids Covalently Linked to a  
613 Rhamnopolysaccharide Backbone. *Mbio*. 10.1128/mbio.00277-20
- 614 28. Thurlow, L. R., Thomas, V. C., and Hancock, L. E. (2009) Capsular polysaccharide  
615 production in *Enterococcus faecalis* and contribution of CpsF to capsule serospecificity.  
616 *Journal of bacteriology*. **191**, 6203–6210
- 617 29. Teng, F. (2002) Evidence that the Enterococcal Polysaccharide Antigen Gene (epa)  
618 Cluster Is Widespread in *Enterococcus faecalis* and Influences Resistance to Phagocytic  
619 Killing of *E. faecalis*. *Infection and immunity*. **70**, 2010–2015
- 620 30. Teng, F., Singh, K. V., Bourgoigne, A., Zeng, J., and Murray, B. E. (2009) Further  
621 characterization of the epa gene cluster and Epa polysaccharides of *Enterococcus faecalis*.  
622 *Infection and immunity*. **77**, 3759–3767
- 623 31. Dale, J. L., Cagnazzo, J., Phan, C. Q., Barnes, A. M. T., and Dunny, G. M. (2015)  
624 Multiple roles for *Enterococcus faecalis* glycosyltransferases in biofilm-associated  
625 antibiotic resistance, cell envelope integrity, and conjugative transfer. *Antimicrobial Agents*  
626 *and Chemotherapy*. **59**, 4094–4105
- 627 32. Xu, Y., Murray, B. E., and Weinstock, G. M. (1998) A cluster of genes involved in  
628 polysaccharide biosynthesis from *Enterococcus faecalis* OG1RF. *Infection and immunity*.  
629 **66**, 4313–4323
- 630 33. Korir, M. L., Dale, J. L., and Dunny, G. M. (2019) Role of epaQ, a Previously  
631 Uncharacterized *Enterococcus faecalis* Gene, in Biofilm Development and Antimicrobial  
632 Resistance. *J Bacteriol*. 10.1128/jb.00078-19
- 633 34. Chatterjee, A., Johnson, C. N., Luong, P., Hullahalli, K., McBride, S. W., Schubert, A.  
634 M., Palmer, K. L., Carlson, P. E., and Duerkop, B. A. (2019) Bacteriophage Resistance  
635 Alters Antibiotic-Mediated Intestinal Expansion of Enterococci. *Infect Immun*.  
636 10.1128/iai.00085-19

- 637 35. Singh, K. V., and Murray, B. E. (2019) Loss of a Major Enterococcal Polysaccharide  
638 Antigen (Epa) by *Enterococcus faecalis* Is Associated with Increased Resistance to  
639 Ceftriaxone and Carbapenems. *Antimicrob Agents Ch.* 10.1128/aac.00481-19
- 640 36. Thoden, J. B., and Holden, H. M. (2007) The molecular architecture of glucose-1-  
641 phosphate uridylyltransferase. *Protein science : a publication of the Protein Society.* **16**,  
642 432–440
- 643 37. Aragão, D., Fialho, A. M., Marques, A. R., Mitchell, E. P., Sá-Correia, I., and Frazão,  
644 C. (2007) The complex of *Sphingomonas elodea* ATCC 31461 glucose-1-phosphate  
645 uridylyltransferase with glucose-1-phosphate reveals a novel quaternary structure, unique  
646 among nucleoside diphosphate-sugar pyrophosphorylase members. *Journal of bacteriology.*  
647 **189**, 4520–4528
- 648 38. Bentley, S. D., Aanensen, D. M., Mavroidi, A., Saunders, D., Rabbinowitsch, E.,  
649 Collins, M., Donohoe, K., Harris, D., Murphy, L., Quail, M. A., Samuel, G., Skovsted, I.  
650 C., Kalltoft, M. S., Barrell, B., Reeves, P. R., Parkhill, J., and Spratt, B. G. (2006) Genetic  
651 Analysis of the Capsular Biosynthetic Locus from All 90 Pneumococcal Serotypes. *PLOS*  
652 *Genetics.* **2**, e31-8
- 653 39. Prasad, S. B., Jayaraman, G., and Ramachandran, K. B. (2010) Hyaluronic acid  
654 production is enhanced by the additional co-expression of UDP-glucose pyrophosphorylase  
655 in *Lactococcus lactis*. *Applied microbiology and biotechnology.* **86**, 273–283
- 656 40. Mollerach, M., López, R., and García, E. (1998) Characterization of the galU gene of  
657 *Streptococcus pneumoniae* encoding a uridine diphosphoglucose pyrophosphorylase: a  
658 gene essential for capsular polysaccharide biosynthesis. *The Journal of experimental*  
659 *medicine.* **188**, 2047–2056
- 660 41. Hardy, G. G., Caimano, M. J., and Yother, J. (2000) Capsule biosynthesis and basic  
661 metabolism in *Streptococcus pneumoniae* are linked through the cellular  
662 phosphoglucomutase. *Journal of bacteriology.* **182**, 1854–1863
- 663 42. Maekawa, S., Yoshioka, M., and Kumamoto, Y. (1992) Proposal of a new scheme for  
664 the serological typing of *Enterococcus faecalis* strains. **36**, 671–681

- 665 43. Hufnagel, M., Hancock, L. E., Koch, S., Theilacker, C., Gilmore, M. S., and Huebner,  
666 J. (2004) Serological and genetic diversity of capsular polysaccharides in *Enterococcus*  
667 *faecalis*. *Journal of Clinical Microbiology*. **42**, 2548–2557
- 668 44. Hancock, L. E., and Gilmore, M. S. (2002) The capsular polysaccharide of  
669 *Enterococcus faecalis* and its relationship to other polysaccharides in the cell wall.  
670 *Proceedings of the National Academy of Sciences of the United States of America*. **99**,  
671 1574–1579
- 672 45. Rigottier-Gois, L., Alberti, A., Houel, A., Taly, J.-F., Palcy, P., Manson, J., Pinto, D.,  
673 Matos, R. C., Carrilero, L., Montero, N., Tariq, M., Karsens, H., Repp, C., Kropec, A.,  
674 Budin-Verneuil, A., Benachour, A., Sauvageot, N., Bizzini, A., Gilmore, M. S., Bessières,  
675 P., Kok, J., Huebner, J., Lopes, F., Gonzalez-Zorn, B., Hartke, A., and Serror, P. (2011)  
676 Large-Scale Screening of a Targeted *Enterococcus faecalis* Mutant Library Identifies  
677 Envelope Fitness Factors. *PloS one*. **6**, e29023-10
- 678 46. Weart, R. B., Lee, A. H., Chien, A.-C., Haeusser, D. P., Hill, N. S., and Levin, P. A.  
679 (2007) A metabolic sensor governing cell size in bacteria. *Cell*. **130**, 335–347
- 680 47. Cho, H., Uehara, T., and Bernhardt, T. G. (2014) Beta-lactam antibiotics induce a lethal  
681 malfunctioning of the bacterial cell wall synthesis machinery. *Cell*. **159**, 1300–1311
- 682 48. Dunny, G. M., Craig, R. A. R., Carron, R. L. R., and Clewell, D. B. (1979) Plasmid  
683 transfer in *Streptococcus faecalis*: production of multiple sex pheromones by recipients.  
684 *Plasmid*. **2**, 454–465
- 685 49. Fujimoto, S., and Ike, Y. (2001) pAM401-based shuttle vectors that enable  
686 overexpression of promoterless genes and one-step purification of tag fusion proteins  
687 directly from *Enterococcus faecalis*. *Applied and Environmental Microbiology*. **67**, 1262–  
688 1267
- 689 50. Bryan, E. M., Bae, T., Kleerebezem, M., and Dunny, G. M. (2000) Improved Vectors  
690 for Nisin-Controlled Expression in Gram-Positive Bacteria. *Plasmid*. **44**, 183–190
- 691 51. Kristich, C. J., Chandler, J. R., and Dunny, G. M. (2007) Development of a host-  
692 genotype-independent counterselectable marker and a high-frequency conjugative delivery  
693 system and their use in genetic analysis of *Enterococcus faecalis*. *Plasmid*. **57**, 131–144

- 694 52. Schindelin, J., Arganda-Carreras, I., Frise, E., Kaynig, V., Longair, M., Pietzsch, T.,  
695 Preibisch, S., Rueden, C., Saalfeld, S., Schmid, B., Tinevez, J.-Y., White, D. J.,  
696 Hartenstein, V., Eliceiri, K., Tomancak, P., and Cardona, A. (2012) Fiji: an open-source  
697 platform for biological-image analysis. *Nature methods*. **9**, 676–682
- 698 53. Paintdakhi, A., Parry, B., Campos, M., Irnov, I., Elf, J., Surovtsev, I., and Jacobs-  
699 Wagner, C. (2016) Oufiti: an integrated software package for high-accuracy, high-  
700 throughput quantitative microscopy analysis. *Molecular microbiology*. **99**, 767–777
- 701 54. Raaphorst, R. van, Kjos, M., and Veening, J.-W. (2020) BactMAP: An R package for  
702 integrating, analyzing and visualizing bacterial microscopy data. *Molecular microbiology*.  
703 **11**, 2699
- 704 55. Villanueva, R. A. M., and Chen, Z. J. (2019) ggplot2: Elegant Graphics for Data  
705 Analysis (2nd ed.). *Meas Interdiscip Res Perspectives*. **17**, 160–167
- 706



| Strains                             | Descriptions                                                                      | References                     |
|-------------------------------------|-----------------------------------------------------------------------------------|--------------------------------|
| <i>E. faecalis</i>                  |                                                                                   |                                |
| OG1S                                | <i>str<sup>r</sup></i> , derivative of OG1                                        | 20                             |
| OG1S:: <i>galU</i> <sup>C862T</sup> | Isogenic mutant of OG1S carrying the point mutation in <i>galU</i>                | This study                     |
| CK111                               | Donor for conjugation of pCJK47 derivatives                                       | 23                             |
| OG1RF                               | <i>rif<sup>r</sup></i> , <i>fus<sup>r</sup></i> , derivative of OG1               | 20                             |
| OG1RFΔ <i>galU</i>                  | Isogenic mutant of OG1RF carrying the in-frame deletion of <i>galU</i>            | This study                     |
| OG1RFΔ <i>epaB</i>                  | Isogenic mutant of OG1RF carrying the in-frame deletion of <i>epaB</i>            | This study                     |
| FA2-2                               | <i>rif<sup>r</sup></i> , <i>fus<sup>r</sup></i> , derivative of JH2               | 20                             |
| FA2-2Δ <i>galU</i>                  | Isogenic mutant of FA2-2 carrying the in-frame deletion of <i>galU</i>            | This study                     |
| <i>E. coli</i>                      |                                                                                   |                                |
| DH5α                                | Host for DNA cloning                                                              | Bethesda Research Laboratories |
| BL21 Rosetta                        | Host for protein expression                                                       | Novagen                        |
| EC1000                              | Host for cloning of pCJK47 derivatives                                            | 23                             |
| Plasmids                            |                                                                                   |                                |
| pMGS100                             | <i>E. coli-E. faecalis</i> shuttle expression plasmid; <i>cat</i>                 | 49                             |
| <i>pgalU</i>                        | pMGS100 containing <i>galU</i> gene                                               | This study                     |
| pCF10-101                           | Helper plasmid for conjugation of pCJK47 derivatives                              | 51                             |
| pCJK47                              | Suicide vector for construction of deletion mutants                               | 51                             |
| pCJK47:: <i>ΔgalU</i>               | pCJK47 containing in-frame deletion of <i>galU</i> and its flanking region        | This study                     |
| pCJK47:: <i>ΔepaB</i>               | pCJK47 containing in-frame deletion of <i>epaB</i> and its flanking region        | This study                     |
| pMSP3535                            | <i>E. coli-E. faecalis</i> shuttle nisin-inducible expression plasmid; <i>erm</i> | 50                             |
| <i>pepaB</i>                        | pMSP3535 containing <i>epaB</i> gene                                              | This study                     |
| pET22(+)                            | Expression vector of His-tagged protein in <i>E. coli</i>                         | Novagen                        |
| pET22:: <i>bacl1</i>                | pET22b (+) containing <i>bacl1</i> , gene derived from pY114                      | 22                             |
| pET22:: <i>bacA</i>                 | pET22b (+) containing <i>bacA</i> gene derived from pY114                         | 22                             |
| Oligonucleotides <sup>a</sup>       |                                                                                   |                                |
| F- <i>galU</i> _del_up              | ccggaattcCCTGGGGGACAGCTTTAGCT                                                     | This study                     |
| R- <i>galU</i> -del_up              | ctctttttcgcTGCTGGAATAACTGCCTTTT                                                   | This study                     |
| F- <i>galU</i> _del_dwn             | gttattccagcaGCGAAAAAAGAGCAACCAAA                                                  | This study                     |
| R- <i>galU</i> -del_dwn             | ccggaattcCTTGAGCATCGTCAGCTGCT                                                     | This study                     |
| F- <i>galU</i> -pMGS                | tttgaggaggcggcATGAAAGTTAAAAAGGCAGT                                                | This study                     |
| R- <i>galU</i> -pMGS                | gcgctgatctatcgTTATTTTTCTTTGGTTGCT                                                 | This study                     |
| F- <i>epaB</i> _del_up              | ccatacgggaattcGGATAGATTTTGTG                                                      | This study                     |
| R- <i>epaB</i> -del_up              | atttgtaaaCGAGATTGTTACCATTTCCTT                                                    | This study                     |
| F- <i>epaB</i> _del_dwn             | aacaatctcgTTTAACAAATGGGGCTGGAG                                                    | This study                     |
| R- <i>epaB</i> -del_dwn             | ccatacgggaattcGAATACTATCTAATTGTTCC                                                | This study                     |
| F- <i>epaB</i> -pMSP3535            | gactctgcatgatcATGAGCATGCAAGAAATGGT                                                | This study                     |
| R- <i>epaB</i> -pMSP3535            | tagtggtaaccgatcTTAAAAGAACCCTCCAGCCCC                                              | This study                     |

<sup>a</sup>Lowercase letters indicate additional nucleotides for enzyme digestion, overlap PCR or seamless cloning.



**Table 2** MICs of antimicrobial drugs for *E. faecalis* strains (mg/L)

|                                                   | ABPC | PEN | VAN | GEN | DAP    | SDS |
|---------------------------------------------------|------|-----|-----|-----|--------|-----|
| OG1S WT                                           | 2    | 2   | 4   | 16  | 1      | 250 |
| OG1S <i>galU</i> <sup>C862T</sup>                 | 4    | 4   | 2   | 4   | <0.125 | 125 |
| OG1S <i>galU</i> <sup>C862T</sup> <i>Nec</i>      | 4    | 4   | 2   | 4   | <0.125 | 125 |
| OG1S <i>galU</i> <sup>C862T</sup> <i>/pgalU 2</i> |      | 2   | 4   | 16  | 1      | 250 |
| OG1RF WT                                          | 2    | 2   | 4   | 16  | 1      | 250 |
| OG1RF $\Delta$ <i>galU</i>                        | 4    | 4   | 2   | 8   | <0.125 | 125 |
| OG1RF $\Delta$ <i>epaB</i>                        | 4    | 4   | 2   | 16  | 1      | 125 |

ABPC, ampicillin; PEN, penicillin; VAN, vancomycin; GEN, gentamicin; DAP, daptomycin; SDS, sodium dodecyl sulfate

## Fig. 1

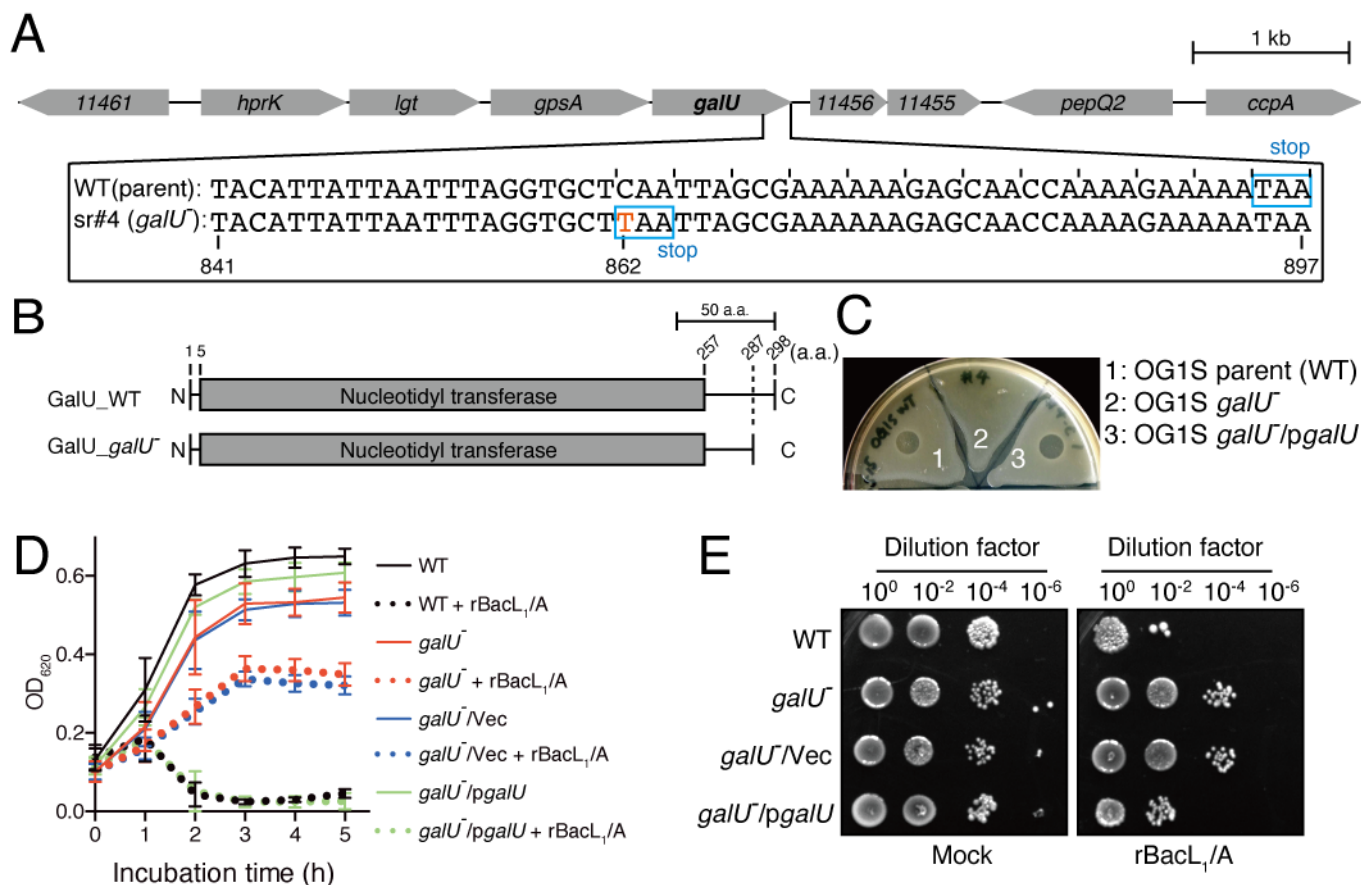

**Figure 1. Genetic mutation found in the strain spontaneously resistant to the antimicrobial activity of Bac41.** (A) Nucleotide sequence alignment of the *galU* (OG1RF\_11457; Gene ID: 12287400) genes of the *E. faecalis* OG1S parent strain (upper) and the OG1S isogenic mutant strain (sr#4) that spontaneously acquired resistance to the antimicrobial activity of Bac41 (lower). Scale bar, 1 kb. (B) Amino acid sequence alignment of the translation products of the *galU* genes of the *E. faecalis* OG1S parent strain (upper) and the OG1S isogenic mutant strain (lower). Scale bar, 50 a.a.. (C) A mixture of recombinant BacL<sub>1</sub>-His and BacA-His proteins (25 ng each) was spotted onto THB soft agar (0.75%) containing the indicator strain *E. faecalis* OG1S (Parent, 1), the spontaneously resistant strain with the *galU* mutation (*galU*<sup>-</sup>, 2), and the *galU*<sup>-</sup> strain complemented via the trans-expression of wild-type GalU from the *pgalU* plasmid (*galU*<sup>-</sup>/*pgalU*, 3). The plate was incubated at 37 °C for 24 h, and the formation of halos was evaluated. (D) Overnight cultures of *E. faecalis* strains, including OG1S (WT), the *galU* mutant (*galU*<sup>-</sup>), the vector control strain of *galU*<sup>-</sup> (*galU*<sup>-</sup>/*Nec*) and the complemented *galU*<sup>-</sup> strain (*galU*<sup>-</sup>/*pgalU*), were inoculated into fresh THB broth at a 5-fold dilution. A mixture of recombinant BacL<sub>1</sub>-His (5 μg/ml) and BacA-His (5 μg/ml) was added to the bacterial suspension and incubated at 37 °C. The turbidity was monitored during the incubation period. The data for each case are presented as the mean ±S.D. (error bars) of three independent experiments. (E) The *E. faecalis* strains were treated with rBacL<sub>1</sub> and BacA (5 μg/ml each) at 37 °C for 4 h, as described in panel D. The bacterial suspensions were serially diluted 100-fold with fresh THB and then spotted onto a THB agar plate, followed by incubation overnight. Colony formation was evaluated as a measure of bacterial viability.

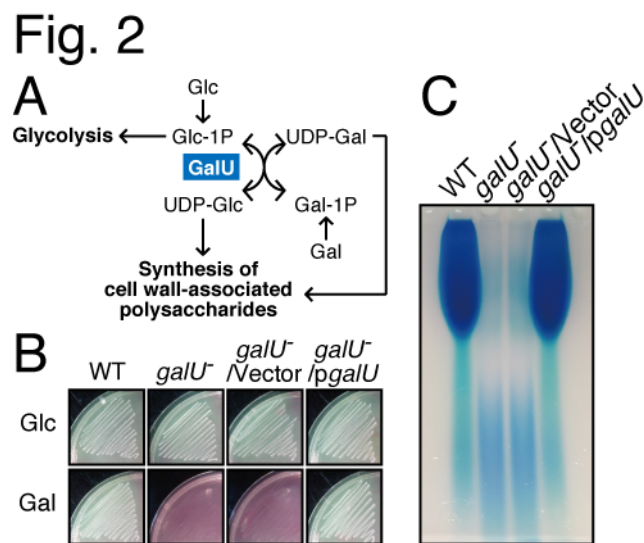

**Figure 2. *galU* is essential for galactose fermentation and cell surface polysaccharide production.** (A) The Leloir pathway of galactose metabolism is illustrated. GalU generates UDP-glucose (UDP-Glc) from glucose-1-phosphate (Glc-1P) and ATP. (B) The *E. faecalis* wild-type, *galU*<sup>-</sup>, *galU*<sup>-</sup>/*N*ec and *galU*<sup>-</sup>/*pgalU* strains were grown in HI agar medium supplemented with phenol red as a pH indicator and glucose (Glc) or galactose (Gal) as the fermentation source. (C) The *E. faecalis* wild-type, *galU*<sup>-</sup>, *galU*<sup>-</sup>/*N*ec and *galU*<sup>-</sup>/*pgalU* strains were grown in THB broth supplemented with glucose, and the cell wall-associated polysaccharides were prepared as described in the Materials and Methods section. The resulting polysaccharides were separated via 10% acrylamide gel electrophoresis, followed by staining with the Stains-All reagent.

Fig. 3

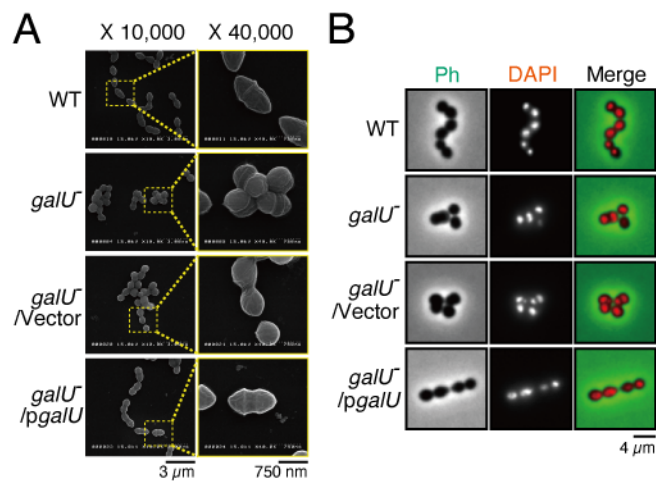

**Figure 3. *galU* is essential for maintaining cell morphology.** (A) The *E. faecalis* wild-type, *galU*, *galU*/Vec and *galU*/p*galU* strains were grown on cover glasses, followed by chemical fixation. The samples were subjected to osmium coating and analyzed under the scanning electron microscope. Scale bars, 3  $\mu$ m (left) and 750 nm (right). (B) Overnight cultures of the *E. faecalis* wild-type, *galU*, *galU*/Vec and *galU*/p*galU* strains were diluted 5-fold with fresh THB broth and incubated, chemically fixed and mounted with DAPI for DNA visualization (red), followed by analysis via fluorescence microscopy. Phase contrast (Ph) is pseudocolored (green) in the merged image. Scale bar, 4  $\mu$ m.

Fig. 4

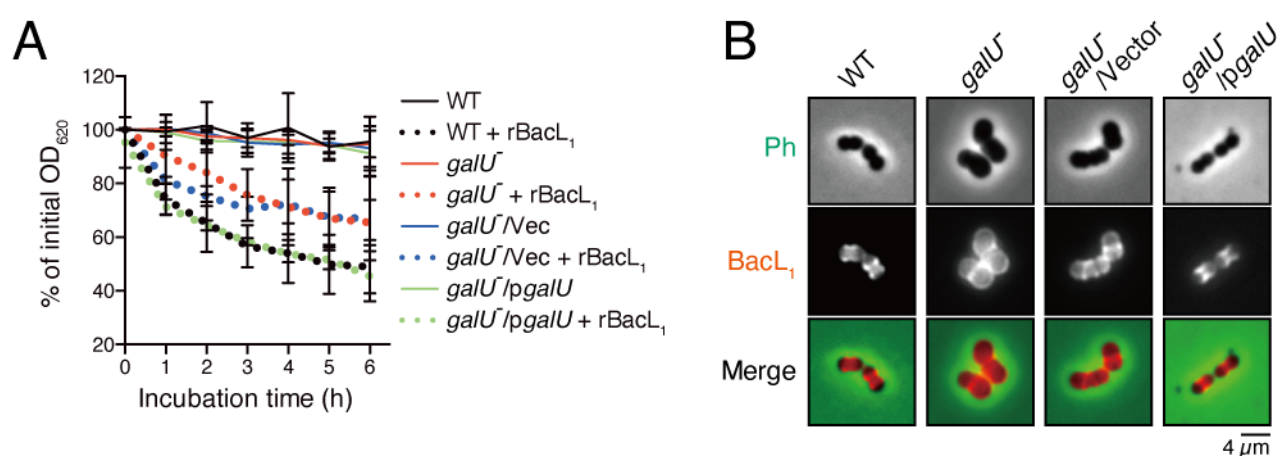

**Figure 4. *galU* inactivation alters the interaction of BacL<sub>1</sub> with the cell wall of *E. faecalis*.** (A) Cell wall fractions prepared from *E. faecalis* wild-type (black), *galU* (red), *galU/Vec* (blue) and *galU/pgalU* (green) in exponential phase were diluted with PBS. Recombinant BacL<sub>1</sub> (rBacL<sub>1</sub>, 5  $\mu\text{g/ml}$ , dotted lines) was added to the cell wall suspension, and the mixture was incubated at 37 °C. The turbidity at 600 nm was quantified at the indicated times during incubation. The presented values are the percentages of the initial turbidity for the respective samples. The PBS-treated sample (mock) is presented as a negative control (straight lines). The data are presented as the mean  $\pm$ S.D. (error bars) of four independent experiments. (B) Overnight cultures of the *E. faecalis* wild-type, *galU*, *galU/Vec* and *galU/pgalU* strains were diluted 5-fold with fresh THB broth and incubated with HiLyte Fluor 555 fluorescent dye-labeled (red) BacL<sub>1</sub> (5  $\mu\text{g/ml}$ ), followed by analysis via fluorescence microscopy. Phase contrast (Ph) is pseudocolored (green) in the merged images. Scale bar, 4  $\mu\text{m}$ .

## Fig. 5

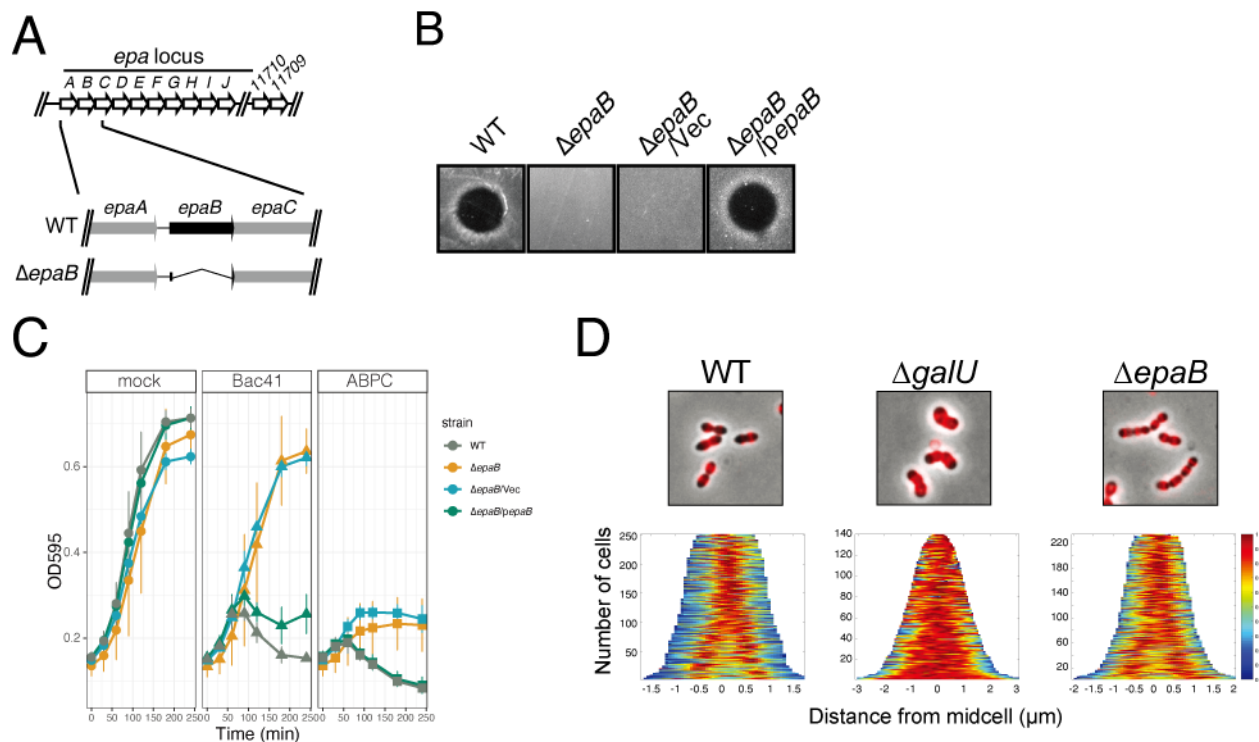

**Figure 5. Effect of *epaB* deletion on the binding affinity of BacL<sub>1</sub> and susceptibility to Bac41 activity.** (A) Genomic organization of the *epa* locus in *E. faecalis* OG1RF and construction of an *epaB*-deletion mutant. (B) A mixture of the recombinant BacL<sub>1</sub>-His and BacA-His proteins (25 ng each) was spotted onto THB soft agar (0.75%) containing the indicator strain *E. faecalis* wild type, *ΔepaB*, *ΔepaB/Vec* and *ΔepaB/pepaB* strains. The plate was incubated at 37 °C for 24 h, and the formation of halos was evaluated. (C) The overnight cultures of the *E. faecalis* strains OG1RF (WT), *ΔepaB*, *ΔepaB/Vec* and *ΔepaB/pepaB* were inoculated into fresh THB broth at a 10-fold dilution in the presence or absence of ABPC (4 mg/L) or Bac41 (BacL1 and BacA, 2.5 μg/mL each), followed by incubation at 37 °C. The turbidity (OD<sub>595</sub>) was monitored during the incubation period. The data for each case are presented as the % of the initial turbidity. The data are presented as the mean ± S.D. (error bars) of three independent experiments. (D) Overnight cultures of the *E. faecalis* wild-type, *ΔgalU* and *ΔepaB* strains were diluted 5-fold with fresh THB broth and incubated with HiLyte Fluor 555 fluorescent dye-labeled (red) BacL<sub>1</sub>\_SH3-His (5 μg/ml), followed by analysis via fluorescence microscopy.



# Fig. 6

bioRxiv preprint doi: <https://doi.org/10.1101/2020.11.20.391417>; this version posted November 20, 2020. The copyright holder for this preprint (which was not certified by peer review) is the author/funder. All rights reserved. No reuse allowed without permission.

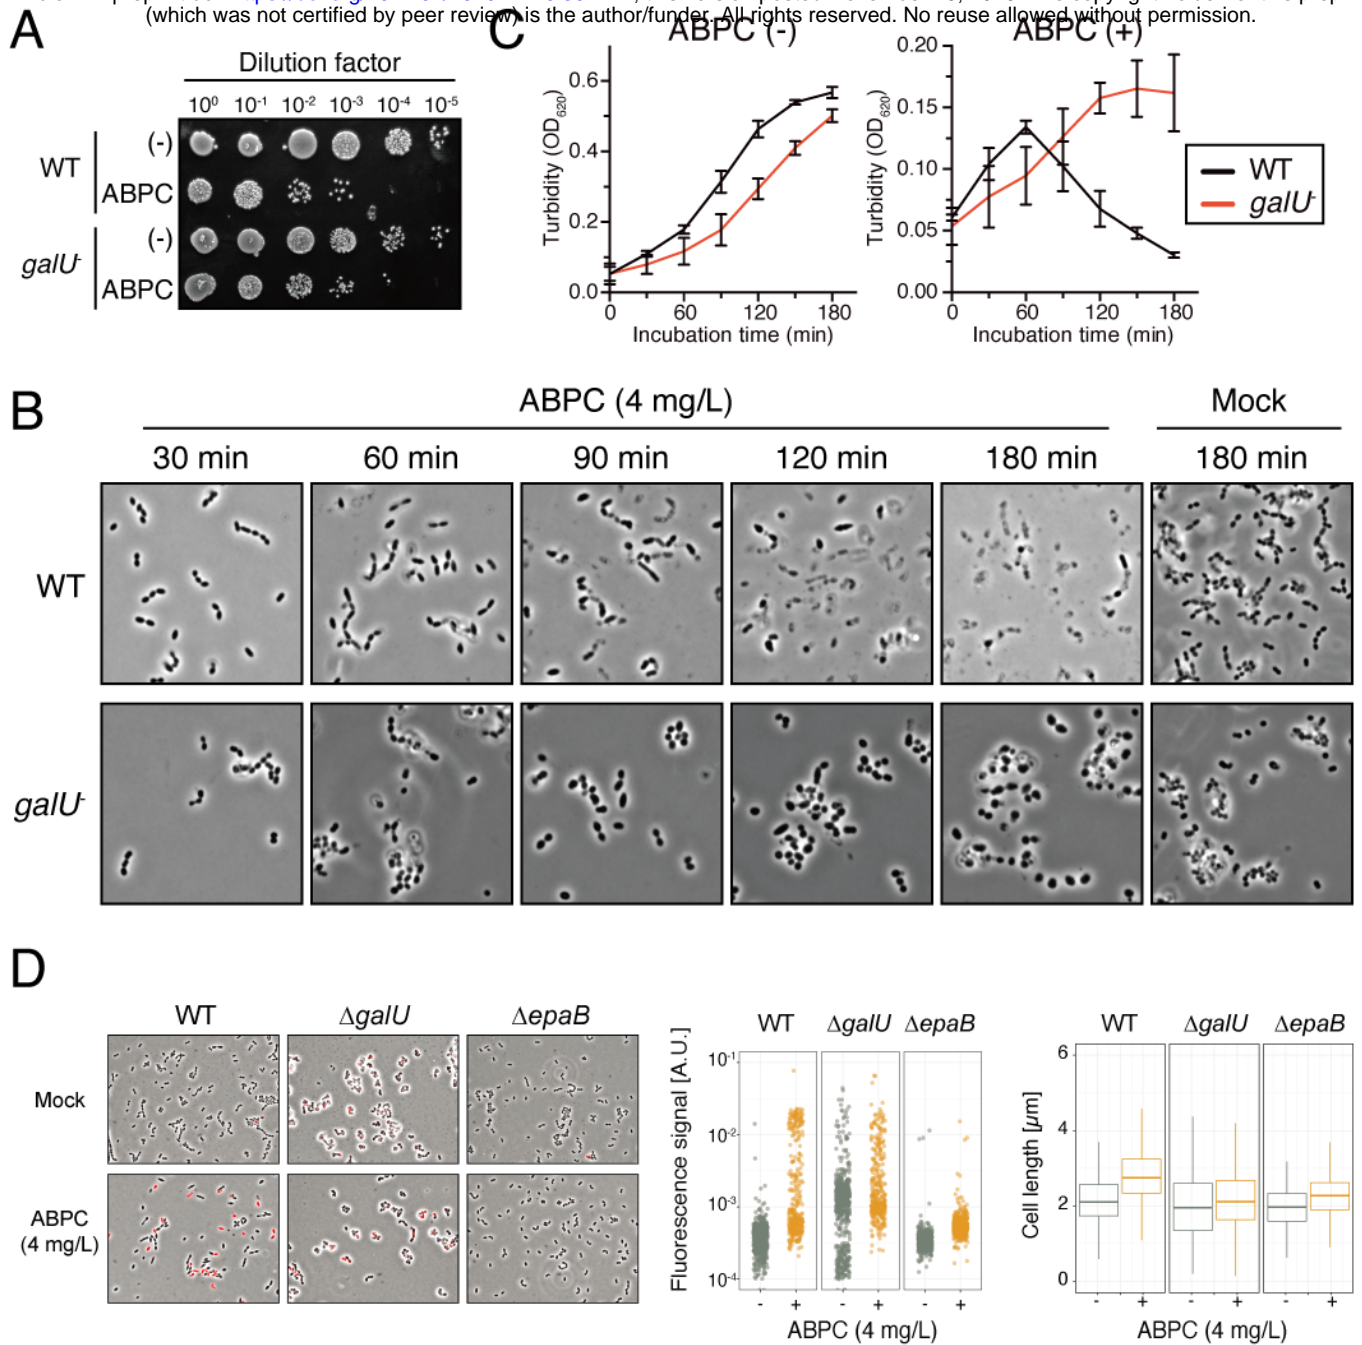

**Figure 6. Different bacteriolysis phenotypes induced by ampicillin treatment (ABPC) in the *E. faecalis* wild-type strain or the *galU* mutant.** (A) The *E. faecalis* strains OG1S (WT) and the *galU* mutant were treated with ABPC (4 mg/L) at 37 °C for 3 h. The bacterial suspensions were serially diluted 10-fold with fresh THB and then spotted onto a THB agar plate, followed by incubation overnight. Colony formation was evaluated as a measure of bacterial viability. (B) Confluent cultures of the *E. faecalis* OG1S (WT) and *galU* strains were diluted 10-fold with fresh THB containing ABPC(4 mg/L), followed by incubation at 37°C. The bacterial suspension was mounted onto a slide and analyzed via microscopy (phase contrast) at the indicated time points: 30, 60, 90, 120 and 180 min after treatment. The yellow arrowheads indicate the cell debris generated by ABPC-induced bacteriolysis. Cells incubated under identical conditions except for the absence of ABPC (Mock) are represented in the right panel as a reference. Scale bar, 20  $\mu$ m. (C) The overnight cultures of the *E. faecalis* strains OG1S (WT) and *galU* were inoculated into fresh THB broth at a 10-fold dilution in the presence or absence of ABPC(4 mg/L), followed by incubation at 37 °C. The turbidity was monitored during the incubation period. The data for each case are presented as the % of the initial turbidity. The data are presented as the mean  $\pm$ S.D. (error bars) of three independent experiments. (D) The overnight cultures of the *E. faecalis* strains OG1RF (WT),  $\Delta galU$  and  $\Delta epaB$  were inoculated into fresh THB broth at a 10-fold dilution in the presence or absence of ABPC (4 mg/L), followed by incubation at 37°C for 1 h with EthD (2 mg/L). The bacterial suspension was mounted onto a slide and analyzed via fluorescence microscopy. Images are shown as merge of phase contrast and red fluorescence signal (EthD). (E and F) Quantification of population with red fluorescence intensity (E) and cell length (F) on each cell was generated images of based on panel D.

Fig. S1

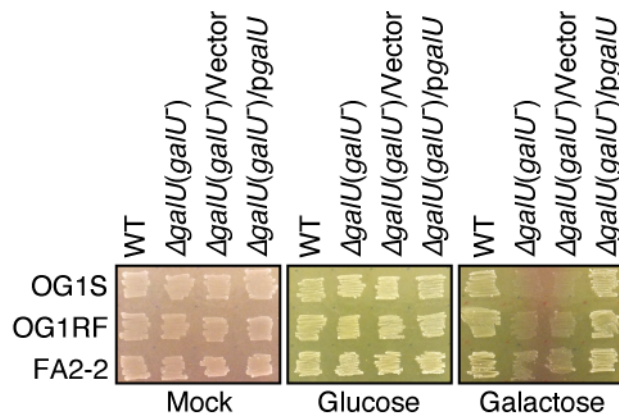

**Supplementary figure S1.** Effect of the *galU* inactivation on glucose or galactose fermentation. The indicated *E. faecalis* strains were grown in HI agar media that was supplemented with phenol red as a pH indicator and glucose or galactose as the fermentation source, respectively.



Fig. S2

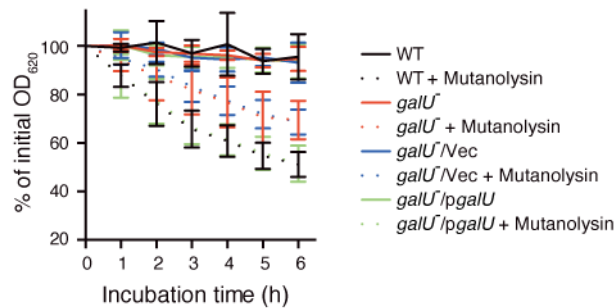

**Supplementary figure S2.** Susceptibility of cell wall derived from the *E. faecalis* strains to Mutanolysin. Cell wall fractions prepared from *E. faecalis* wild type (black), *galU*<sup>-</sup> (red), *galU*<sup>-</sup>/*Vec* (blue) and *galU*<sup>-</sup>/*pgalU* (green) in exponential phase were diluted with PBS. Mutanolysin (1  $\mu$ g/ml, dotted lines) was added to the cell wall suspension, and the mixture was incubated at 37°C. The turbidity at 620 nm was quantified at the indicated times during incubation. The present values are the percentages of the initial turbidity for the respective samples. The PBS treated sample (mock) is presented as a negative control (straight lines). The data are presented as the mean  $\pm$ S.D. (error bars) of four independent experiments.

Fig. S3

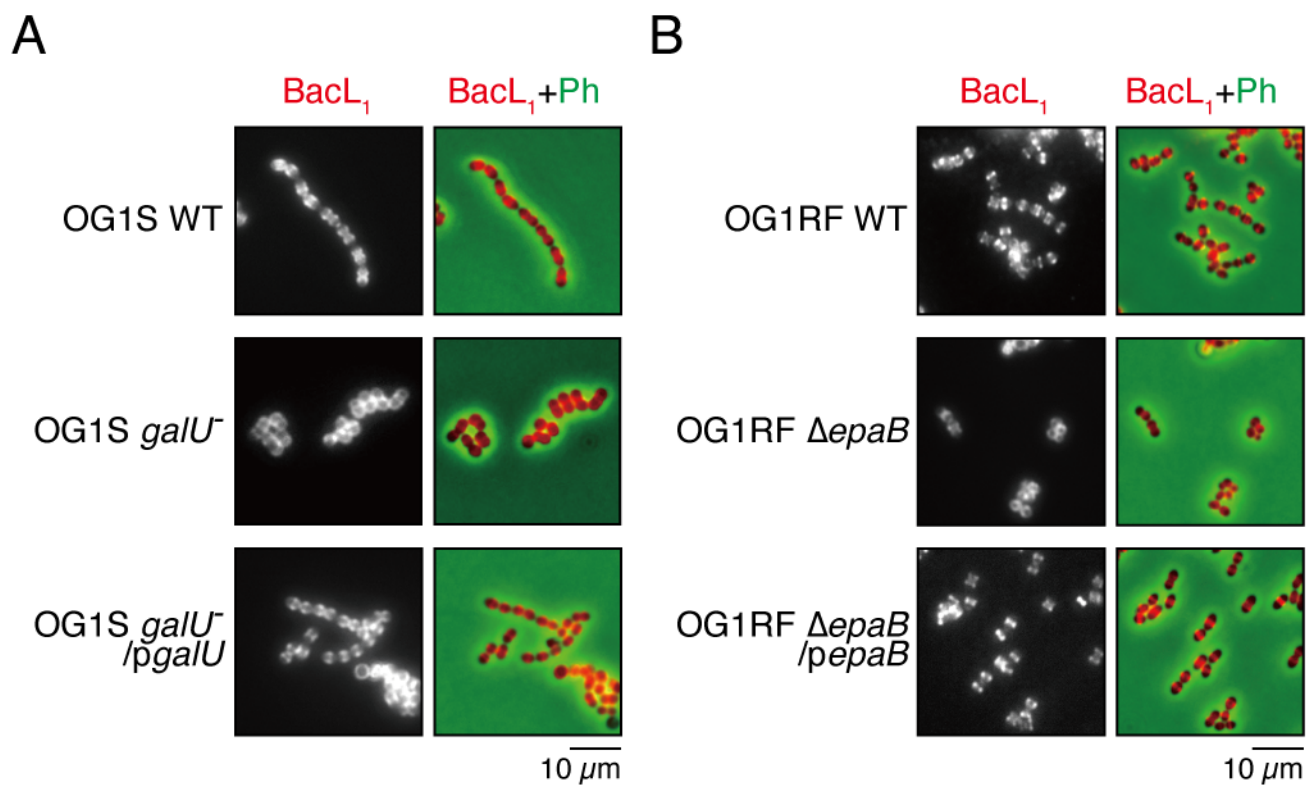

**Supplementary figure S3.** Overnight cultures of *E. faecalis* OG1S wild type, *galU*<sup>-</sup> and *galU*<sup>-</sup>/*pgalU* strains (A) or *E. faecalis* OG1RF wild type,  $\Delta$ *epaB* and  $\Delta$ *epaB*/*pepaB* strains (B) were diluted 5-fold with fresh THB broth, and were incubated with the HiLyte Fluor 555 fluorescent dye-labeled (red) BacL<sub>1</sub> (5 μg/ml), followed by analysis using fluorescence microscopy. Phase contrast (Ph) is pseudocolored (green) in merged images. These image in panel A or B are wide-field versions of the magnificated fluorescent images represented in Fig. 4B or Fig. 5D, respectively. Scale bar; 10 μm.

Fig. S4

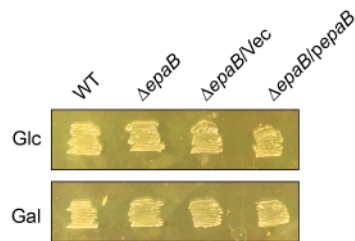

**Supplementary figure S4.** Effect of the *epaB* inactivation on glucose or galactose fermentation. The indicated *E. faecalis* strains were grown in HI agar media that was supplemented with phenol red as a pH indicator and glucose (Glc) or galactose (Gal) as the fermentation source, respectively.

Fig. S5

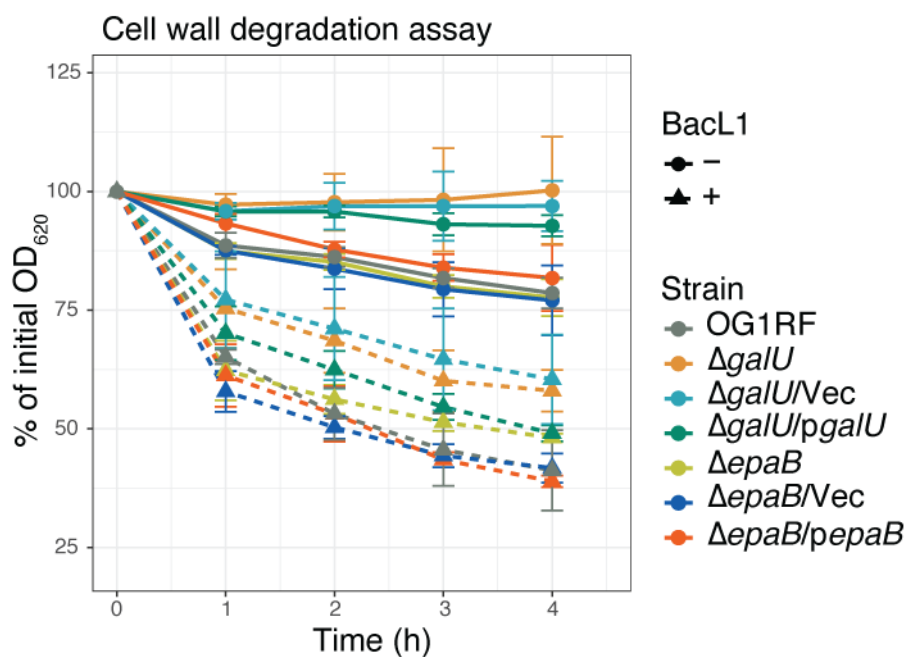

**Supplementary figure S5.** Susceptibility of cell wall derived from the *E. faecalis* strains to recombinant BacL<sub>1</sub>. Cell wall fractions prepared from *E. faecalis* wild type,  $\Delta galU$ ,  $\Delta galU/Vec$ ,  $\Delta galU/pgalU$ ,  $\Delta epaB$ ,  $\Delta epaB/Vec$  and  $\Delta epaB/pepaB$  in exponential phase were diluted with PBS. BacL<sub>1</sub>-His (5  $\mu$ g/ml) was added to the cell wall suspension, and the mixture was incubated at 37°C. The turbidity at 620 nm was quantified at the indicated times during incubation. The present values are the percentages of the initial turbidity for the respective samples. The PBS treated sample (mock) is presented as a negative control (straight lines). The data are presented as the mean  $\pm$ S.D. (error bars) of four independent experiments.

## Fig. S6

```
E.faecalis_OG1RF      -----MKVKKAVIPAAAGLQTRFLPAATKAKAKHEMLPIVDKPTIQFIVEALASGIEDLILV VTKAKKPIEDHFDGNVLENNLKENKNTDLLLVEETDVLNHFIRQSHFRLGHAVLQAKAFVONEFFVVLGDDLME----DVFLLFQLMDDTQFRASTIAVHKVPHEDSKYGI
E.faecalis_JH2-2    -----MKVKKAVIPAAAGLQTRFLPAATKAKAKHEMLPIVDKPTIQFIVEALASGIEDLILV VTKAKKPIEDHFDGNVLENNLKENKNTDLLLVEETDVLNHFIRQSHFRLGHAVLQAKAFVONEFFVVLGDDLME----DVFLLFQLMDDTQFRASTIAVHKVPHEDSKYGI
E.faecium_DO        -----MKVKKAVIPAAAGLQTRFLPAATKAKAKHEMLPIVDKPTIQFIVEALASGIEDLILV VTKAKKPIEDHFDGNVLENNLKENKNTDLLLVEETDVLNHFIRQSHFRLGHAVLQAKAFVONEFFVVLGDDLME----DVFLLFQLMDDTQFRASTIAVHKVPHEDSKYGI
E.hirae_ATCC9790    -----MKVKKAVIPAAAGLQTRFLPAATKAKAKHEMLPIVDKPTIQFIVEALASGIEDLILV VTKAKKPIEDHFDGNVLENNLKENKNTDLLLVEETDVLNHFIRQSHFRLGHAVLQAKAFVONEFFVVLGDDLME----DVFLLFQLMDDTQFRASTIAVHKVPHEDSKYGI
S.suis_BM407        M-K-----KVRKAVIPAAAGLQTRFLPAATKAKAKHEMLPIVDKPTIQFIVEALASGIEDLILV VTKAKKPIEDHFDGNVLENNLKENKNTDLLLVEETDVLNHFIRQSHFRLGHAVLQAKAFVONEFFVVLGDDLMEITDTKAVLFRQLMNDYKTRASTIAVHKVPHEDSKYGI
S.pneumoniae_D39    MFS----KVRKAVIPAAAGLQTRFLPAATKAKAKHEMLPIVDKPTIQFIVEALASGIEDLILV VTKAKKPIEDHFDGNVLENNLKENKNTDLLLVEETDVLNHFIRQSHFRLGHAVLQAKAFVONEFFVVLGDDLMEITDKAVLFRQLMNDYKTRASTIAVHKVPHEDSKYGI
S.mutans_UA159      MFSK---KVRKAVIPAAAGLQTRFLPAATKAKAKHEMLPIVDKPTIQFIVEALASGIEDLILV VTKAKKPIEDHFDGNVLENNLKENKNTDLLLVEETDVLNHFIRQSHFRLGHAVLQAKAFVONEFFVVLGDDLMEITDKAVLFRQLMNDYKTRASTIAVHKVPHEDSKYGI
S.intermedius_B196 M--T----QVRKAVIPAAAGLQTRFLPAATKAKAKHEMLPIVDKPTIQFIVEALASGIEDLILV VTKAKKPIEDHFDGNVLENNLKENKNTDLLLVEETDVLNHFIRQSHFRLGHAVLQAKAFVONEFFVVLGDDLMEITDKAVLFRQLMNDYKTRASTIAVHKVPHEDSKYGI
S.dysgalactiae_AC-2713 M-----KVRKAVIPAAAGLQTRFLPAATKAKAKHEMLPIVDKPTIQFIVEALASGIEDLILV VTKAKKPIEDHFDGNVLENNLKENKNTDLLLVEETDVLNHFIRQSHFRLGHAVLQAKAFVONEFFVVLGDDLMEITDKAVLFRQLMNDYKTRASTIAVHKVPHEDSKYGI
S.agalactiae_2603V_R M--T----KVRKAVIPAAAGLQTRFLPAATKAKAKHEMLPIVDKPTIQFIVEALASGIEDLILV VTKAKKPIEDHFDGNVLENNLKENKNTDLLLVEETDVLNHFIRQSHFRLGHAVLQAKAFVONEFFVVLGDDLMEITDKAVLFRQLMNDYKTRASTIAVHKVPHEDSKYGI
S.pyogenes_M1_GAS  M--T----KVRKAVIPAAAGLQTRFLPAATKAKAKHEMLPIVDKPTIQFIVEALASGIEDLILV VTKAKKPIEDHFDGNVLENNLKENKNTDLLLVEETDVLNHFIRQSHFRLGHAVLQAKAFVONEFFVVLGDDLMEITDKAVLFRQLMNDYKTRASTIAVHKVPHEDSKYGI
* * * * *

E.faecalis_OG1RF      INPKSIEKGLYVNVNFKPKPEAPSDLAII GRVLLTPEIFDVLNKPQAGNEIQLT DAIDTLNKTQRFVAREFKGRYDVGDKPQPMKTSIEYGLTHPEVQKDLREYIINLQGL-----AKKQPKK-
E.faecalis_JH2-2    INPKSIEKGLYVNVNFKPKPEAPSDLAII GRVLLTPEIFDVLNKPQAGNEIQLT DAIDTLNKTQRFVAREFKGRYDVGDKPQPMKTSIEYGLTHPEVQKDLREYIINLQGL-----AKKQPKK-
E.faecium_DO        INPQSELEDGLYVNVNFKPKPEAPSDLAII GRVLLTPEIFDVLNKPQAGNEIQLT DAIDTLNKTQRFVAREFKGRYDVGDKPQPMKTSIEYGLTHPEVQKDLREYIINLQGL-----AKKQPKK-
E.hirae_ATCC9790    INPQSELEDGLYVNVNFKPKPEAPSDLAII GRVLLTPEIFDVLNKPQAGNEIQLT DAIDTLNKTQRFVAREFKGRYDVGDKPQPMKTSIEYGLTHPEVQKDLREYIINLQGL-----AKKQPKK-
S.suis_BM407        IAPQSGVNGLYSVDFVVEKPKPEAPSDLAII GRVLLTPEIFDVLNKPQAGNEIQLT DAIDTLNKTQRFVAREFKGRYDVGDKPQPMKTSIEYGLTHPEVQKDLREYIINLQGL-----AKKQPKK-
S.pneumoniae_D39    IAPQSGVNGLYSVDFVVEKPKPEAPSDLAII GRVLLTPEIFDVLNKPQAGNEIQLT DAIDTLNKTQRFVAREFKGRYDVGDKPQPMKTSIEYGLTHPEVQKDLREYIINLQGL-----AKKQPKK-
S.mutans_UA159      IAPQSGVNGLYSVDFVVEKPKPEAPSDLAII GRVLLTPEIFDVLNKPQAGNEIQLT DAIDTLNKTQRFVAREFKGRYDVGDKPQPMKTSIEYGLTHPEVQKDLREYIINLQGL-----AKKQPKK-
S.intermedius_B196 IAPQSGVNGLYSVDFVVEKPKPEAPSDLAII GRVLLTPEIFDVLNKPQAGNEIQLT DAIDTLNKTQRFVAREFKGRYDVGDKPQPMKTSIEYGLTHPEVQKDLREYIINLQGL-----AKKQPKK-
S.dysgalactiae_AC-2713 IAPQSGVNGLYSVDFVVEKPKPEAPSDLAII GRVLLTPEIFDVLNKPQAGNEIQLT DAIDTLNKTQRFVAREFKGRYDVGDKPQPMKTSIEYGLTHPEVQKDLREYIINLQGL-----AKKQPKK-
S.agalactiae_2603V_R IAPQSGVNGLYSVDFVVEKPKPEAPSDLAII GRVLLTPEIFDVLNKPQAGNEIQLT DAIDTLNKTQRFVAREFKGRYDVGDKPQPMKTSIEYGLTHPEVQKDLREYIINLQGL-----AKKQPKK-
S.pyogenes_M1_GAS  IAPQSGVNGLYSVDFVVEKPKPEAPSDLAII GRVLLTPEIFDVLNKPQAGNEIQLT DAIDTLNKTQRFVAREFKGRYDVGDKPQPMKTSIEYGLTHPEVQKDLREYIINLQGL-----AKKQPKK-
* * * * *
```

**Figure S6. Alignment of the amino acid sequences of GalU homologues (GalU/HasC) from various Gram-positive bacterial species.** The deleted region in the *galU*- strain used in this study is surrounded by a red frame. Source strains and GI numbers: *E. faecalis* OG1S/OG1RF (GI:327535310); *Enterococcus faecalis* JH2-2 (GI:551092274); *Enterococcus faecium* DO (GI:389869192); *Enterococcus hirae* ATCC9790 (GI:498408730); *Streptococcus suis* BM407 (GI:253756447); *Streptococcus pneumoniae* D39 (GI:116076768); *Streptococcus mutans* UA159 (GI:24378821); *Streptococcus intermedius* B196 (GI:538452117); *Streptococcus dysgalactiae* AC-2713 (GI:489151789); *Streptococcus agalactiae* 2603V R (GI:22536589); and *Streptococcus pyogenes* M1 GAS (GI:15674413).



Fig. S8

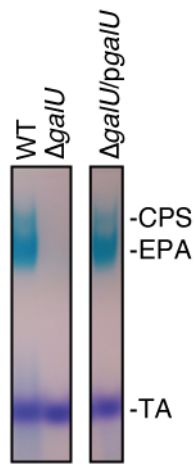

**Supplementary figure S8.** Effect of *galU* deletion on the cell wall-associated polysaccharide production in *E. faecalis* FA2-2. The *E. faecalis* FA 2-2 wild type,  $\Delta galU$ , and  $\Delta galU/pgalU$  strains were grown in THB broth supplemented with glucose, and the cell wall-associated polysaccharides were prepared as described in the Materials and Methods section. The resulting polysaccharides were separated via 10% acrylamide gel electrophoresis, followed by staining with the Stains-All reagent. CPS, Capsule polysaccharide; EPA, Enterococcal polysaccharide antigen; TA, Teichoic acid.
